# Supplementary material for: Drug Prescription Awareness Among Dental Students in Kerala: a Survey of Current Knowledge and Awareness
Source: Research Square preprint supplement (doi:10.21203/rs.3.rs-3865424/v1), 2024-02-16
Supplement: Supplementary file 1 [file 15fdd7a995f45c79006a183b.xlsx]

## Sheet: Form Responses 1
Timestamp	You are included in this study because	I affirm that I have been informed about the study titled "Drug prescription awareness among dental students - a survey of current knowledge and awareness ." I have also been informed that the information provided will be used for research purposes. (Please give your name and age below)		1. What are the most common health conditions treated in dental practice?	2. Which is the most common nonsteroidal anti-inflammatory drugs (NSAID) you prescribe?	3. Which antibiotics are most commonly prescribed?	4. What are the most common errors occurring during prescription of drugs?	5. What are your sources for prescription information?	6. Do you use World Health Organization(WHO) guide to good prescribing for drug prescription?	7. Do you have appropriate knowledge about dose of drug to prescribe?	8. Do you know about the frequency of drug to be prescribe?	9. Do you know for how long the drug has to be given?	10. Did you know the correct route of drug delivery?
2023-01-07 20:48:47	You are a house surgeon in college	Anwar 24	I agree to participate in this study with my own wish. I have read and understood the information given by the investigator about the study and it has been explained to me in my own language., I understand that my participation is voluntary and free of coercion., I have been given option that I may refuse to participate or withdraw my participation from the study without effecting my health care …	Dental Pain	Paracetamol	Amoxicillin	Incorrect Dosage	Colleagues	No	No	No	Yes	Yes
2023-01-07 20:52:08	You are a house surgeon in college	Anitta C Raj. 23	I agree to participate in this study with my own wish. I have read and understood the information given by the investigator about the study and it has been explained to me in my own language., I understand that my participation is voluntary and free of coercion., I have been given option that I may refuse to participate or withdraw my participation from the study without effecting my health care …	Dental Pain	Paracetamol	Amoxicillin	Incorrect Dosage	Professors	No	No	No	No	No
2023-01-07 20:52:09	You are a house surgeon in college	Akhila s kumar, 25	I agree to participate in this study with my own wish. I have read and understood the information given by the investigator about the study and it has been explained to me in my own language., I understand that my participation is voluntary and free of coercion., I have been given option that I may refuse to participate or withdraw my participation from the study without effecting my health care …	Dental caries	Others	Amoxicillin	Incorrect Dosage	Professors	No	No	No	No	No
2023-01-07 20:53:36	You are a house surgeon in college	Haritha S R 24 years	I agree to participate in this study with my own wish. I have read and understood the information given by the investigator about the study and it has been explained to me in my own language., I understand that my participation is voluntary and free of coercion., I have been given option that I may refuse to participate or withdraw my participation from the study without effecting my health care …	Dental Pain	Paracetamol	Amoxicillin	Incorrect Dosage	Professors	Yes	Yes	Yes	Yes	Yes
2023-01-07 20:53:50	You are a house surgeon in college	Karon Lin Kovoor, 23	I agree to participate in this study with my own wish. I have read and understood the information given by the investigator about the study and it has been explained to me in my own language., I understand that my participation is voluntary and free of coercion., I have been given option that I may refuse to participate or withdraw my participation from the study without effecting my health care …	Dental caries	Paracetamol	Amoxicillin	Incorrect Dosage	Professors	Yes	Yes	Yes	Yes	Yes
2023-01-07 20:54:20	You are a final year dental student in College	Arun 22	I agree to participate in this study with my own wish. I have read and understood the information given by the investigator about the study and it has been explained to me in my own language., I understand that my participation is voluntary and free of coercion., I have been given option that I may refuse to participate or withdraw my participation from the study without effecting my health care …	Dental Pain	Others	Amoxicillin and Clavulanic acid combination	Incorrect name of the drug	Others	No	No	No	No	No
2023-01-07 20:55:47	You are a house surgeon in college	Shilpa Roy D 24 years	I agree to participate in this study with my own wish. I have read and understood the information given by the investigator about the study and it has been explained to me in my own language., I understand that my participation is voluntary and free of coercion., I have been given option that I may refuse to participate or withdraw my participation from the study without effecting my health care …	Dental Pain	Diclofenac	Amoxicillin	Incompatibilities/Drug interactions	Professors	Yes	Yes	Yes	Yes	Yes
2023-01-07 20:56:27	You are a final year dental student in College	Navneeth 23	I agree to participate in this study with my own wish. I have read and understood the information given by the investigator about the study and it has been explained to me in my own language., I understand that my participation is voluntary and free of coercion., I have been given option that I may refuse to participate or withdraw my participation from the study without effecting my health care …	Dental caries	Paracetamol	Amoxicillin	Others	Colleagues	No	Yes	No	No	No
2023-01-07 20:56:57	You are a house surgeon in college	Athira 24	I agree to participate in this study with my own wish. I have read and understood the information given by the investigator about the study and it has been explained to me in my own language.	Dental Pain	Paracetamol	Metrogyl	Incorrect name of the drug	Professors	Yes	Yes	Yes	Yes	Yes
2023-01-07 20:57:22	You are a house surgeon in college	Anjitha 26 yrs	I agree to participate in this study with my own wish. I have read and understood the information given by the investigator about the study and it has been explained to me in my own language., I understand that my participation is voluntary and free of coercion., I have been given option that I may refuse to participate or withdraw my participation from the study without effecting my health care …	Dental Pain	Diclofenac	Amoxicillin	Incorrect Dosage	Professors	Yes	Yes	Yes	Yes	Yes
2023-01-07 20:57:35	You are a house surgeon in college	Malavika, 23	I agree to participate in this study with my own wish. I have read and understood the information given by the investigator about the study and it has been explained to me in my own language., I understand that my participation is voluntary and free of coercion., I have been given option that I may refuse to participate or withdraw my participation from the study without effecting my health care …	Dental caries	Paracetamol	Amoxicillin	Incorrect Dosage	Professors	No	Yes	Yes	Yes	Yes
2023-01-07 20:58:30	You are a house surgeon in college	Sreelekshmi. S	I permit the researcher to utilise the information given by me and results obtained from the study for publication while protecting privacy and confidentiality.	Dental caries	Diclofenac	Amoxicillin	Incompatibilities/Drug interactions	Professors	No	Yes	Yes	Yes	Yes
2023-01-07 20:58:35	You are a final year dental student in College	Amal , 25	I agree to participate in this study with my own wish. I have read and understood the information given by the investigator about the study and it has been explained to me in my own language., I understand that my participation is voluntary and free of coercion., I have been given option that I may refuse to participate or withdraw my participation from the study without effecting my health care …	Dental caries	Paracetamol	Amoxicillin and Clavulanic acid combination	Incorrect Dosage	Others	No	No	No	Yes	Yes
2023-01-07 21:10:04	You are a house surgeon in college	Jisha	I agree to participate in this study with my own wish. I have read and understood the information given by the investigator about the study and it has been explained to me in my own language., I understand that my participation is voluntary and free of coercion., I have been given option that I may refuse to participate or withdraw my participation from the study without effecting my health care …	Dental Pain	Paracetamol	Amoxicillin	Incorrect Dosage	Professors	Yes	Yes	Yes	Yes	Yes
2023-01-07 21:12:55	You are a final year dental student in College	KIRAN V A 25	I agree to participate in this study with my own wish. I have read and understood the information given by the investigator about the study and it has been explained to me in my own language., I understand that my participation is voluntary and free of coercion., I have been given option that I may refuse to participate or withdraw my participation from the study without effecting my health care …	Dental Pain	Paracetamol	Amoxicillin	Incompatibilities/Drug interactions	Professors	No	Yes	Yes	Yes	Yes
2023-01-07 21:17:58	You are a house surgeon in college	Amritha s nair	I agree to participate in this study with my own wish. I have read and understood the information given by the investigator about the study and it has been explained to me in my own language., I understand that my participation is voluntary and free of coercion., I have been given option that I may refuse to participate or withdraw my participation from the study without effecting my health care …	Dental caries	Diclofenac	Amoxicillin and Clavulanic acid combination	Incorrect Dosage	Textbook	Yes	Yes	Yes	Yes	Yes
2023-01-07 21:17:58	You are a house surgeon in college	Surabhi S S, 24	I agree to participate in this study with my own wish. I have read and understood the information given by the investigator about the study and it has been explained to me in my own language., I understand that my participation is voluntary and free of coercion., I have been given option that I may refuse to participate or withdraw my participation from the study without effecting my health care …	Dental caries	Paracetamol	Amoxicillin	Incompatibilities/Drug interactions	Professors	No	Yes	Yes	Yes	Yes
2023-01-07 21:18:33	You are a final year dental student in College	SARAN V A 22	I agree to participate in this study with my own wish. I have read and understood the information given by the investigator about the study and it has been explained to me in my own language., I understand that my participation is voluntary and free of coercion., I have been given option that I may refuse to participate or withdraw my participation from the study without effecting my health care …	Dental Pain	Paracetamol	Amoxicillin	Incompatibilities/Drug interactions	Professors	No	Yes	Yes	Yes	Yes
2023-01-07 21:19:56	You are a house surgeon in college	Meenusha S,24	I agree to participate in this study with my own wish. I have read and understood the information given by the investigator about the study and it has been explained to me in my own language., I understand that my participation is voluntary and free of coercion., I have been given option that I may refuse to participate or withdraw my participation from the study without effecting my health care …	Dental caries	Paracetamol	Amoxicillin	Incorrect Dosage	Colleagues	No	Yes	Yes	Yes	Yes
2023-01-07 21:20:05	You are a final year dental student in College	PRANAV 26	I agree to participate in this study with my own wish. I have read and understood the information given by the investigator about the study and it has been explained to me in my own language., I understand that my participation is voluntary and free of coercion., I have been given option that I may refuse to participate or withdraw my participation from the study without effecting my health care …	Dental Pain	Paracetamol	Amoxicillin	Incompatibilities/Drug interactions	Professors	Yes	Yes	Yes	Yes	Yes
2023-01-07 21:20:37	You are a house surgeon in college	Amal Jacob	I agree to participate in this study with my own wish. I have read and understood the information given by the investigator about the study and it has been explained to me in my own language., I understand that my participation is voluntary and free of coercion., I have been given option that I may refuse to participate or withdraw my participation from the study without effecting my health care …	Dental Pain	Paracetamol	Amoxicillin	Incorrect Dosage	Others	Yes	Yes	No	Yes	No
2023-01-07 21:22:12	You are a house surgeon in college	Ameena.S	I agree to participate in this study with my own wish. I have read and understood the information given by the investigator about the study and it has been explained to me in my own language., I understand that my participation is voluntary and free of coercion., I have been given option that I may refuse to participate or withdraw my participation from the study without effecting my health care …	Dental Pain	Diclofenac	Amoxicillin	Incompatibilities/Drug interactions	Textbook	Yes	No	Yes	Yes	Yes
2023-01-07 21:23:02	You are a house surgeon in college	AHALYAPRIYA 24	I agree to participate in this study with my own wish. I have read and understood the information given by the investigator about the study and it has been explained to me in my own language.	Dental caries	Diclofenac	Amoxicillin	Incorrect Dosage	Textbook	Yes	Yes	Yes	Yes	Yes
2023-01-07 21:31:18	You are a house surgeon in college	Amina 24	I agree to participate in this study with my own wish. I have read and understood the information given by the investigator about the study and it has been explained to me in my own language., I understand that my participation is voluntary and free of coercion., I have been given option that I may refuse to participate or withdraw my participation from the study without effecting my health care …	Dental caries	Paracetamol	Amoxicillin	Incompatibilities/Drug interactions	Professors	Yes	Yes	No	No	No
2023-01-07 21:40:11	You are a house surgeon in college	Vismaya 24	I agree to participate in this study with my own wish. I have read and understood the information given by the investigator about the study and it has been explained to me in my own language., I understand that my participation is voluntary and free of coercion., I have been given option that I may refuse to participate or withdraw my participation from the study without effecting my health care …	Dental caries	Diclofenac	Amoxicillin	Incorrect Dosage	Textbook	No	No	No	No	No
2023-01-07 21:47:37	You are a house surgeon in college	Dr.Harisree .V .R , 24 yrs	I agree to participate in this study with my own wish. I have read and understood the information given by the investigator about the study and it has been explained to me in my own language.	Dental caries	Diclofenac	Amoxicillin	Incorrect Dosage	Textbook	Yes	Yes	Yes	Yes	Yes
2023-01-07 22:03:26	You are a house surgeon in college	Reshma p 25	I agree to participate in this study with my own wish. I have read and understood the information given by the investigator about the study and it has been explained to me in my own language., I understand that my participation is voluntary and free of coercion., I have been given option that I may refuse to participate or withdraw my participation from the study without effecting my health care …	Dental Pain	Diclofenac	Metrogyl	Incorrect Dosage	Colleagues	Yes	No	Yes	Yes	Yes
2023-01-08 06:34:40	You are a house surgeon in college	karthika Raj 24years	I agree to participate in this study with my own wish. I have read and understood the information given by the investigator about the study and it has been explained to me in my own language., I understand that my participation is voluntary and free of coercion., I have been given option that I may refuse to participate or withdraw my participation from the study without effecting my health care …	Dental caries	Diclofenac	Amoxicillin	Incorrect Dosage	Professors	Yes	No	Yes	Yes	No
2023-01-08 08:08:55	You are a final year dental student in College	Archa SK 24 yrs	I agree to participate in this study with my own wish. I have read and understood the information given by the investigator about the study and it has been explained to me in my own language.	Dental caries	Diclofenac	Amoxicillin	Incompatibilities/Drug interactions	Textbook	No	Yes	Yes	Yes	Yes
2023-01-08 13:32:10	You are a house surgeon in college	Anju P, 24	I agree to participate in this study with my own wish. I have read and understood the information given by the investigator about the study and it has been explained to me in my own language., I understand that my participation is voluntary and free of coercion., I have been given option that I may refuse to participate or withdraw my participation from the study without effecting my health care …	Dental Pain	Diclofenac	Amoxicillin	Incorrect Dosage	Textbook	Yes	Yes	Yes	Yes	No
2023-01-10 09:31:53	You are a house surgeon in college	Aparna	I agree to participate in this study with my own wish. I have read and understood the information given by the investigator about the study and it has been explained to me in my own language., I understand that my participation is voluntary and free of coercion., I have been given option that I may refuse to participate or withdraw my participation from the study without effecting my health care …	Dental Pain	Diclofenac	Amoxicillin and Clavulanic acid combination	Others	Professors	No	No	Yes	Yes	Yes
2023-01-10 19:58:40	You are a house surgeon in college	Fathima Mohammad Iqbal, 24	I agree to participate in this study with my own wish. I have read and understood the information given by the investigator about the study and it has been explained to me in my own language.	Dental Pain	Paracetamol	Amoxicillin	Incorrect Dosage	Textbook	Yes	Yes	Yes	Yes	Yes
2023-02-02 09:02:20	You are a house surgeon in college	Arya v vijayan 25	I agree to participate in this study with my own wish. I have read and understood the information given by the investigator about the study and it has been explained to me in my own language., I understand that my participation is voluntary and free of coercion., I have been given option that I may refuse to participate or withdraw my participation from the study without effecting my health care …	Tooth Sensitivity	Diclofenac	Amoxicillin	Incorrect Dosage	Colleagues	Yes	Yes	No	Yes	No
2023-02-02 09:11:55	You are a house surgeon in college	Ameena.S 25	I agree to participate in this study with my own wish. I have read and understood the information given by the investigator about the study and it has been explained to me in my own language., I understand that my participation is voluntary and free of coercion., I have been given option that I may refuse to participate or withdraw my participation from the study without effecting my health care …	Dental caries	Diclofenac	Amoxicillin and Clavulanic acid combination	Incorrect Dosage	Textbook	Yes	Yes	Yes	Yes	Yes
2023-02-02 09:19:27	You are a house surgeon in college	Sandra Santhosh 24	I agree to participate in this study with my own wish. I have read and understood the information given by the investigator about the study and it has been explained to me in my own language., I understand that my participation is voluntary and free of coercion., I have been given option that I may refuse to participate or withdraw my participation from the study without effecting my health care …	Dental caries	Diclofenac	Amoxicillin and Clavulanic acid combination	Incorrect Dosage	Textbook	No	Yes	Yes	No	Yes
2023-02-02 09:19:33	You are a house surgeon in college	Keerthana. M. P	I agree to participate in this study with my own wish. I have read and understood the information given by the investigator about the study and it has been explained to me in my own language.	Dental caries	Diclofenac	Amoxicillin	Incompatibilities/Drug interactions	Professors	Yes	Yes	Yes	Yes	Yes
2023-02-02 09:22:14	You are a house surgeon in college	Haritha S R 24 years old	I agree to participate in this study with my own wish. I have read and understood the information given by the investigator about the study and it has been explained to me in my own language., I understand that my participation is voluntary and free of coercion., I have been given option that I may refuse to participate or withdraw my participation from the study without effecting my health care …	Dental Pain	Paracetamol	Metrogyl	Incorrect Dosage	Textbook	Yes	Yes	Yes	Yes	Yes
2023-02-02 09:23:02	You are a house surgeon in college	Ardra Sreekumar 24yrs	I agree to participate in this study with my own wish. I have read and understood the information given by the investigator about the study and it has been explained to me in my own language.	Dental Pain	Paracetamol	Amoxicillin	Incorrect Dosage	Textbook	Yes	Yes	Yes	Yes	No
2023-02-02 09:23:20	You are a house surgeon in college	Fathima Nizar,24 years	I understand that my participation is voluntary and free of coercion.	Dental caries	Diclofenac	Amoxicillin	Incorrect Dosage	Professors	No	Yes	Yes	Yes	Yes
2023-02-02 09:27:54	You are a house surgeon in college	Krishnaveni V, 25 years	I agree to participate in this study with my own wish. I have read and understood the information given by the investigator about the study and it has been explained to me in my own language., I understand that my participation is voluntary and free of coercion., I have been given option that I may refuse to participate or withdraw my participation from the study without effecting my health care …	Dental Pain	Diclofenac	Amoxicillin and Clavulanic acid combination	Incorrect Dosage	Professors	Yes	Yes	Yes	Yes	Yes
2023-02-02 09:37:19	You are a house surgeon in college	Ancy Thomas 25	I agree to participate in this study with my own wish. I have read and understood the information given by the investigator about the study and it has been explained to me in my own language., I understand that my participation is voluntary and free of coercion., I have been given option that I may refuse to participate or withdraw my participation from the study without effecting my health care …	Dental caries	Diclofenac	Amoxicillin and Clavulanic acid combination	Incorrect Dosage	Professors	Yes	Yes	No	Yes	Yes
2023-02-02 09:38:17	You are a house surgeon in college	Emy Krishna 24	I agree to participate in this study with my own wish. I have read and understood the information given by the investigator about the study and it has been explained to me in my own language.	Dental Pain	Paracetamol	Amoxicillin and Clavulanic acid combination	Incorrect Dosage	Textbook	Yes	Yes	Yes	Yes	Yes
2023-02-02 09:40:24	You are a final year dental student in College	Devapriya C	I agree to participate in this study with my own wish. I have read and understood the information given by the investigator about the study and it has been explained to me in my own language., I understand that my participation is voluntary and free of coercion., I have been given option that I may refuse to participate or withdraw my participation from the study without effecting my health care …	Dental Pain	Diclofenac	Amoxicillin	Others	Professors	Yes	Yes	Yes	Yes	Yes
2023-02-02 09:45:19	You are a house surgeon in college	Abirami AR 23	I agree to participate in this study with my own wish. I have read and understood the information given by the investigator about the study and it has been explained to me in my own language., I understand that my participation is voluntary and free of coercion., I have been given option that I may refuse to participate or withdraw my participation from the study without effecting my health care …	Dental caries	Diclofenac	Amoxicillin and Clavulanic acid combination	Incorrect Dosage	Textbook	Yes	Yes	Yes	Yes	Yes
2023-02-02 09:56:20	You are a final year dental student in College	Anudhana k p, 22 yrs	I agree to participate in this study with my own wish. I have read and understood the information given by the investigator about the study and it has been explained to me in my own language., I understand that my participation is voluntary and free of coercion., I have been given option that I may refuse to participate or withdraw my participation from the study without effecting my health care …	Dental caries	Paracetamol	Amoxicillin and Clavulanic acid combination	Incompatibilities/Drug interactions	Professors	Yes	Yes	Yes	Yes	Yes
2023-02-02 10:06:02	You are a house surgeon in college	AHALYAPRIYA A B 24	I agree to participate in this study with my own wish. I have read and understood the information given by the investigator about the study and it has been explained to me in my own language.	Dental caries	Paracetamol	Amoxicillin	Incorrect Dosage	Textbook	Yes	Yes	Yes	Yes	Yes
2023-02-02 10:38:18	You are a house surgeon in college	Noorjahan N S, 24 years	I agree to participate in this study with my own wish. I have read and understood the information given by the investigator about the study and it has been explained to me in my own language.	Dental caries	Paracetamol	Amoxicillin	Incorrect Dosage	Professors	No	No	No	No	Yes
2023-02-02 10:40:01	You are a house surgeon in college	Thaslima	I agree to participate in this study with my own wish. I have read and understood the information given by the investigator about the study and it has been explained to me in my own language., I understand that my participation is voluntary and free of coercion., I have been given option that I may refuse to participate or withdraw my participation from the study without effecting my health care …	Dental caries	Paracetamol	Amoxicillin and Clavulanic acid combination	Incompatibilities/Drug interactions	Colleagues	Yes	Yes	Yes	Yes	Yes
2023-02-02 10:43:19	You are a house surgeon in college	Viji Krishna 23yrs	I agree to participate in this study with my own wish. I have read and understood the information given by the investigator about the study and it has been explained to me in my own language., I understand that my participation is voluntary and free of coercion., I have been given option that I may refuse to participate or withdraw my participation from the study without effecting my health care …	Dental Pain	Paracetamol	Amoxicillin	Incompatibilities/Drug interactions	Textbook	No	Yes	Yes	Yes	No
2023-02-02 10:49:07	You are a final year dental student in College	shincy 23	I agree to participate in this study with my own wish. I have read and understood the information given by the investigator about the study and it has been explained to me in my own language., I understand that my participation is voluntary and free of coercion., I have been given option that I may refuse to participate or withdraw my participation from the study without effecting my health care …	Tooth Sensitivity	Paracetamol	Metrogyl	Incorrect Dosage	Professors	Yes	Yes	Yes	No	Yes
2023-02-02 10:51:25	You are a house surgeon in college	Shabna sha	I agree to participate in this study with my own wish. I have read and understood the information given by the investigator about the study and it has been explained to me in my own language., I understand that my participation is voluntary and free of coercion., I have been given option that I may refuse to participate or withdraw my participation from the study without effecting my health care …	Dental caries	Paracetamol	Amoxicillin and Clavulanic acid combination	Incorrect Dosage	Textbook	Yes	Yes	Yes	Yes	Yes
2023-02-02 11:37:48	You are a house surgeon in college	Gopika Raj,,,24 yr	I understand that my participation is voluntary and free of coercion.	Dental Pain	Diclofenac	Metrogyl	Incorrect Dosage	Professors	No	No	Yes	Yes	No
2023-02-02 15:01:33	You are a final year dental student in College	Aanand Raj	I agree to participate in this study with my own wish. I have read and understood the information given by the investigator about the study and it has been explained to me in my own language., I understand that my participation is voluntary and free of coercion., I have been given option that I may refuse to participate or withdraw my participation from the study without effecting my health care …	Dental caries	Paracetamol	Metrogyl	Incorrect Dosage	Professors	Yes	Yes	Yes	Yes	Yes
2023-02-02 15:16:27	You are a house surgeon in college	Abhirami S Shaji 24yrs	I agree to participate in this study with my own wish. I have read and understood the information given by the investigator about the study and it has been explained to me in my own language., I understand that my participation is voluntary and free of coercion., I have been given option that I may refuse to participate or withdraw my participation from the study without effecting my health care …	Dental caries	Aceclofenac	Amoxicillin	Incorrect Dosage	Professors	No	Yes	Yes	Yes	Yes
2023-02-02 17:43:51	You are a house surgeon in college	Anto p jose	I agree to participate in this study with my own wish. I have read and understood the information given by the investigator about the study and it has been explained to me in my own language., I understand that my participation is voluntary and free of coercion., I have been given option that I may refuse to participate or withdraw my participation from the study without effecting my health care …	Dental caries	Diclofenac	Amoxicillin	Others	Colleagues	Yes	Yes	Yes	Yes	Yes
2023-02-02 17:46:53	You are a final year dental student in College	Aswani	I agree to participate in this study with my own wish. I have read and understood the information given by the investigator about the study and it has been explained to me in my own language., I understand that my participation is voluntary and free of coercion., I have been given option that I may refuse to participate or withdraw my participation from the study without effecting my health care …	Dental caries	Paracetamol	Amoxicillin	Incompatibilities/Drug interactions	Textbook	Yes	Yes	Yes	Yes	Yes
2023-02-02 20:57:10	You are a house surgeon in college	Aravind 20	I agree to participate in this study with my own wish. I have read and understood the information given by the investigator about the study and it has been explained to me in my own language.	Dental Pain	Aceclofenac	Amoxicillin and Clavulanic acid combination	Others	Textbook	No	Yes	Yes	Yes	Yes
2023-02-02 23:06:08	You are a final year dental student in College	Tejas Mahajan 21	I agree to participate in this study with my own wish. I have read and understood the information given by the investigator about the study and it has been explained to me in my own language., I understand that my participation is voluntary and free of coercion., I have been given option that I may refuse to participate or withdraw my participation from the study without effecting my health care …	Dental Pain	Aceclofenac	Amoxicillin and Clavulanic acid combination	Incompatibilities/Drug interactions	Textbook	Yes	No	Yes	Yes	Yes
2023-02-03 13:11:29	You are a house surgeon in college	Naruto 22	I have been given option that I may refuse to participate or withdraw my participation from the study without effecting my health care or rights.	Dental caries	Diclofenac	Amoxicillin and Clavulanic acid combination	Incompatibilities/Drug interactions	Others	No	Yes	Yes	Yes	Yes
2023-04-04 20:10:59	You are a house surgeon in college	Manu 24	I agree to participate in this study with my own wish. I have read and understood the information given by the investigator about the study and it has been explained to me in my own language., I understand that my participation is voluntary and free of coercion., I have been given option that I may refuse to participate or withdraw my participation from the study without effecting my health care …	Dental caries	Paracetamol	Amoxicillin	Incorrect Dosage	Colleagues	Yes	No	Yes	No	Yes
2023-04-07 20:18:48	You are a house surgeon in college	Sunitha 23	I agree to participate in this study with my own wish. I have read and understood the information given by the investigator about the study and it has been explained to me in my own language., I understand that my participation is voluntary and free of coercion., I have been given option that I may refuse to participate or withdraw my participation from the study without effecting my health care …	Dental Pain	Paracetamol	Amoxicillin	Incorrect Dosage	Textbook	No	No	No	No	Yes
2023-04-13 09:58:40	You are a house surgeon in college	Greeshma Sivan S 27	I agree to participate in this study with my own wish. I have read and understood the information given by the investigator about the study and it has been explained to me in my own language., I understand that my participation is voluntary and free of coercion., I have been given option that I may refuse to participate or withdraw my participation from the study without effecting my health care …	Dental caries	Paracetamol	Amoxicillin	Others	Textbook	Yes	Yes	Yes	Yes	Yes
2023-04-13 10:00:40	You are a house surgeon in college	SHINAZ N 26	I agree to participate in this study with my own wish. I have read and understood the information given by the investigator about the study and it has been explained to me in my own language., I understand that my participation is voluntary and free of coercion., I have been given option that I may refuse to participate or withdraw my participation from the study without effecting my health care …	Dental Pain	Paracetamol	Amoxicillin	Incorrect Dosage	Professors	No	No	No	No	No
2023-04-13 10:01:53	You are a house surgeon in college	Anjana Gopal v.s (24)	I agree to participate in this study with my own wish. I have read and understood the information given by the investigator about the study and it has been explained to me in my own language., I understand that my participation is voluntary and free of coercion., I have been given option that I may refuse to participate or withdraw my participation from the study without effecting my health care …	Dental caries	Paracetamol	Amoxicillin	Incorrect Dosage	Professors	Yes	Yes	Yes	Yes	Yes
2023-04-13 11:01:30	You are a house surgeon in college	Ajimi Basheer	I agree to participate in this study with my own wish. I have read and understood the information given by the investigator about the study and it has been explained to me in my own language.	Dental Pain	Paracetamol	Amoxicillin	Incorrect Dosage	Professors	No	No	Yes	No	Yes
2023-04-13 19:27:49	You are a house surgeon in college	Midhuna 24	I agree to participate in this study with my own wish. I have read and understood the information given by the investigator about the study and it has been explained to me in my own language., I understand that my participation is voluntary and free of coercion., I have been given option that I may refuse to participate or withdraw my participation from the study without effecting my health care …	Dental Pain	Aceclofenac	Amoxicillin	Incompatibilities/Drug interactions	Professors	No	Yes	Yes	Yes	Yes
2023-04-13 19:31:04	You are a house surgeon in college	Divyaa Mary Joe	I agree to participate in this study with my own wish. I have read and understood the information given by the investigator about the study and it has been explained to me in my own language., I understand that my participation is voluntary and free of coercion., I have been given option that I may refuse to participate or withdraw my participation from the study without effecting my health care …	Dental caries	Paracetamol	Amoxicillin	Incorrect name of the drug	Textbook	No	Yes	Yes	Yes	Yes
2023-04-13 19:40:28	You are a house surgeon in college	Nithya jose 25	I agree to participate in this study with my own wish. I have read and understood the information given by the investigator about the study and it has been explained to me in my own language., I understand that my participation is voluntary and free of coercion., I have been given option that I may refuse to participate or withdraw my participation from the study without effecting my health care …	Dental caries	Others	Amoxicillin and Clavulanic acid combination	Incompatibilities/Drug interactions	Colleagues	No	No	No	No	No
2023-04-13 20:04:06	You are a house surgeon in college	Sinu Sunny, 24	I agree to participate in this study with my own wish. I have read and understood the information given by the investigator about the study and it has been explained to me in my own language., I understand that my participation is voluntary and free of coercion., I have been given option that I may refuse to participate or withdraw my participation from the study without effecting my health care …	Dental caries	Aceclofenac	Amoxicillin	Incorrect Dosage	Professors	No	No	No	No	Yes
2023-04-13 20:18:40	You are a house surgeon in college	Sandra 25	I agree to participate in this study with my own wish. I have read and understood the information given by the investigator about the study and it has been explained to me in my own language.	Dental caries	Paracetamol	Amoxicillin	Others	Professors	Yes	Yes	Yes	Yes	Yes
2023-04-14 13:35:34	You are a house surgeon in college	Ahalyapriya A.B	I agree to participate in this study with my own wish. I have read and understood the information given by the investigator about the study and it has been explained to me in my own language.	Dental Pain	Paracetamol	Amoxicillin	Incorrect name of the drug	Textbook	Yes	Yes	Yes	Yes	Yes
2023-05-03 15:58:24	You are a house surgeon in college	Viji, 23	I agree to participate in this study with my own wish. I have read and understood the information given by the investigator about the study and it has been explained to me in my own language., I understand that my participation is voluntary and free of coercion., I have been given option that I may refuse to participate or withdraw my participation from the study without effecting my health care …	Dental caries	Diclofenac	Metrogyl	Incorrect name of the drug	Colleagues	No	No	No	No	No
2023-05-05 08:29:14	You are a house surgeon in college	Archa SK & 25 yrs	I agree to participate in this study with my own wish. I have read and understood the information given by the investigator about the study and it has been explained to me in my own language.	Dental caries	Diclofenac	Amoxicillin	Incorrect Dosage	Professors	No	Yes	No	Yes	Yes
2023-05-11 07:11:56	You are a final year dental student in College	Gokul 24yrs	I agree to participate in this study with my own wish. I have read and understood the information given by the investigator about the study and it has been explained to me in my own language., I understand that my participation is voluntary and free of coercion., I have been given option that I may refuse to participate or withdraw my participation from the study without effecting my health care …	Dental Pain	Paracetamol	Amoxicillin and Clavulanic acid combination	Incorrect Dosage	Textbook	No	No	Yes	Yes	Yes
2023-05-11 08:31:57	You are a house surgeon in college	Anju Ajay 25	I agree to participate in this study with my own wish. I have read and understood the information given by the investigator about the study and it has been explained to me in my own language., I understand that my participation is voluntary and free of coercion., I have been given option that I may refuse to participate or withdraw my participation from the study without effecting my health care …	Dental caries	Paracetamol	Amoxicillin and Clavulanic acid combination	Incorrect Dosage	Professors	Yes	Yes	Yes	Yes	Yes
2023-05-11 08:34:57	You are a final year dental student in College	rekha 23	I agree to participate in this study with my own wish. I have read and understood the information given by the investigator about the study and it has been explained to me in my own language., I understand that my participation is voluntary and free of coercion., I have been given option that I may refuse to participate or withdraw my participation from the study without effecting my health care …	Dental Pain	Diclofenac	Amoxicillin	Others	Professors	Yes	Yes	Yes	Yes	Yes
2023-05-11 08:36:00	You are a house surgeon in college	Revathy mohan 24	I agree to participate in this study with my own wish. I have read and understood the information given by the investigator about the study and it has been explained to me in my own language., I understand that my participation is voluntary and free of coercion., I have been given option that I may refuse to participate or withdraw my participation from the study without effecting my health care …	Dental caries	Paracetamol	Amoxicillin	Incorrect Dosage	Textbook	Yes	No	No	Yes	No
2023-05-11 08:36:25	You are a house surgeon in college	24	I agree to participate in this study with my own wish. I have read and understood the information given by the investigator about the study and it has been explained to me in my own language., I understand that my participation is voluntary and free of coercion., I have been given option that I may refuse to participate or withdraw my participation from the study without effecting my health care …	Dental Pain	Diclofenac	Amoxicillin	Incorrect Dosage	Textbook	Yes	Yes	Yes	Yes	Yes
2023-05-11 08:37:53	You are a house surgeon in college	25	I agree to participate in this study with my own wish. I have read and understood the information given by the investigator about the study and it has been explained to me in my own language., I understand that my participation is voluntary and free of coercion., I have been given option that I may refuse to participate or withdraw my participation from the study without effecting my health care …	Dental Pain	Diclofenac	Amoxicillin and Clavulanic acid combination	Incompatibilities/Drug interactions	Textbook	Yes	Yes	Yes	Yes	Yes
2023-05-11 08:45:33	You are a final year dental student in College	Anaswara 25	I agree to participate in this study with my own wish. I have read and understood the information given by the investigator about the study and it has been explained to me in my own language., I understand that my participation is voluntary and free of coercion., I have been given option that I may refuse to participate or withdraw my participation from the study without effecting my health care …	Dental caries	Paracetamol	Amoxicillin	Incorrect Dosage	Textbook	Yes	No	No	Yes	No
2023-05-11 08:59:56	You are a final year dental student in College	Aadhya AM 21	I agree to participate in this study with my own wish. I have read and understood the information given by the investigator about the study and it has been explained to me in my own language.	Dental caries	Diclofenac	Amoxicillin	Incorrect Dosage	Professors	Yes	Yes	Yes	Yes	Yes
2023-05-11 09:01:33	You are a final year dental student in College	Amritha. L. S. 22	I agree to participate in this study with my own wish. I have read and understood the information given by the investigator about the study and it has been explained to me in my own language., I understand that my participation is voluntary and free of coercion., I have been given option that I may refuse to participate or withdraw my participation from the study without effecting my health care …	Tooth Sensitivity	Aceclofenac	Amoxicillin	Incompatibilities/Drug interactions	Professors	Yes	Yes	Yes	Yes	Yes
2023-05-11 09:01:33	You are a final year dental student in College	Akhila .ps 22	I agree to participate in this study with my own wish. I have read and understood the information given by the investigator about the study and it has been explained to me in my own language., I understand that my participation is voluntary and free of coercion., I have been given option that I may refuse to participate or withdraw my participation from the study without effecting my health care …	Tooth Sensitivity	Aceclofenac	Amoxicillin	Incompatibilities/Drug interactions	Professors	Yes	Yes	Yes	Yes	Yes
2023-05-11 09:02:19	You are a final year dental student in College	Devika, 21	I agree to participate in this study with my own wish. I have read and understood the information given by the investigator about the study and it has been explained to me in my own language., I understand that my participation is voluntary and free of coercion., I have been given option that I may refuse to participate or withdraw my participation from the study without effecting my health care …	Dental caries	Paracetamol	Amoxicillin	Incorrect Dosage	Textbook	Yes	No	Yes	No	Yes
2023-05-11 09:31:01	You are a final year dental student in College	Name: Meenakshi V S Age: 21	I understand that my participation is voluntary and free of coercion.	Dental caries	Paracetamol	Amoxicillin	Incorrect Dosage	Textbook	Yes	No	No	Yes	No
2023-05-11 09:41:43	You are a final year dental student in College	Sreesankar. 23	I agree to participate in this study with my own wish. I have read and understood the information given by the investigator about the study and it has been explained to me in my own language., I understand that my participation is voluntary and free of coercion., I have been given option that I may refuse to participate or withdraw my participation from the study without effecting my health care …	Dental Pain	Paracetamol	Metrogyl	Others	Professors	Yes	Yes	Yes	Yes	Yes
2023-05-11 09:57:14	You are a house surgeon in college	Shine 23yrs	I agree to participate in this study with my own wish. I have read and understood the information given by the investigator about the study and it has been explained to me in my own language., I understand that my participation is voluntary and free of coercion., I have been given option that I may refuse to participate or withdraw my participation from the study without effecting my health care …	Dental caries	Paracetamol	Amoxicillin	Incorrect Dosage	Textbook	No	No	Yes	Yes	Yes
2023-05-11 10:00:09	You are a house surgeon in college	Divya 24 years	I agree to participate in this study with my own wish. I have read and understood the information given by the investigator about the study and it has been explained to me in my own language., I understand that my participation is voluntary and free of coercion., I have been given option that I may refuse to participate or withdraw my participation from the study without effecting my health care …	Dental Pain	Diclofenac	Amoxicillin and Clavulanic acid combination	Others	Others	No	No	No	No	No
2023-05-11 10:02:08	You are a house surgeon in college	Soyal T R , age : 25	I agree to participate in this study with my own wish. I have read and understood the information given by the investigator about the study and it has been explained to me in my own language., I understand that my participation is voluntary and free of coercion., I have been given option that I may refuse to participate or withdraw my participation from the study without effecting my health care …	Dental caries	Paracetamol	Amoxicillin	Incorrect Dosage	Textbook	Yes	No	No	Yes	No
2023-05-11 10:02:25	You are a final year dental student in College	Nivetha 22years	I agree to participate in this study with my own wish. I have read and understood the information given by the investigator about the study and it has been explained to me in my own language., I understand that my participation is voluntary and free of coercion., I have been given option that I may refuse to participate or withdraw my participation from the study without effecting my health care …	Dental caries	Paracetamol	Amoxicillin and Clavulanic acid combination	Incorrect Dosage	Professors	Yes	No	Yes	Yes	No
2023-05-11 10:04:38	You are a final year dental student in College	Megha.j,22	I agree to participate in this study with my own wish. I have read and understood the information given by the investigator about the study and it has been explained to me in my own language., I understand that my participation is voluntary and free of coercion., I have been given option that I may refuse to participate or withdraw my participation from the study without effecting my health care …	Dental Pain	Paracetamol	Amoxicillin and Clavulanic acid combination	Incompatibilities/Drug interactions	Professors	Yes	Yes	Yes	Yes	Yes
2023-05-11 10:08:04	You are a final year dental student in College	Ramika	I agree to participate in this study with my own wish. I have read and understood the information given by the investigator about the study and it has been explained to me in my own language., I understand that my participation is voluntary and free of coercion., I have been given option that I may refuse to participate or withdraw my participation from the study without effecting my health care …	Dental Pain	Paracetamol	Amoxicillin and Clavulanic acid combination	Incompatibilities/Drug interactions	Textbook	Yes	Yes	Yes	Yes	Yes
2023-05-11 10:08:06	You are a final year dental student in College	Mydhili J S	I agree to participate in this study with my own wish. I have read and understood the information given by the investigator about the study and it has been explained to me in my own language., I understand that my participation is voluntary and free of coercion., I have been given option that I may refuse to participate or withdraw my participation from the study without effecting my health care …	Dental Pain	Paracetamol	Amoxicillin and Clavulanic acid combination	Incompatibilities/Drug interactions	Textbook	Yes	Yes	Yes	Yes	Yes
2023-05-11 10:12:11	You are a final year dental student in College	Devapriya C	I agree to participate in this study with my own wish. I have read and understood the information given by the investigator about the study and it has been explained to me in my own language., I understand that my participation is voluntary and free of coercion., I have been given option that I may refuse to participate or withdraw my participation from the study without effecting my health care …	Dental caries	Paracetamol	Amoxicillin and Clavulanic acid combination	Incorrect Dosage	Professors	Yes	Yes	Yes	Yes	Yes
2023-05-11 10:15:13	You are a final year dental student in College	Maria Kuriakose 22	I agree to participate in this study with my own wish. I have read and understood the information given by the investigator about the study and it has been explained to me in my own language.	Dental Pain	Paracetamol	Amoxicillin	Incompatibilities/Drug interactions	Textbook	Yes	Yes	Yes	Yes	Yes
2023-05-11 10:31:35	You are a final year dental student in College	Vidhya -21	I agree to participate in this study with my own wish. I have read and understood the information given by the investigator about the study and it has been explained to me in my own language., I understand that my participation is voluntary and free of coercion., I have been given option that I may refuse to participate or withdraw my participation from the study without effecting my health care …	Dental caries	Paracetamol	Amoxicillin and Clavulanic acid combination	Incompatibilities/Drug interactions	Professors	Yes	Yes	Yes	Yes	Yes
2023-05-11 10:48:37	You are a final year dental student in College	Swathi 24	I agree to participate in this study with my own wish. I have read and understood the information given by the investigator about the study and it has been explained to me in my own language., I understand that my participation is voluntary and free of coercion., I have been given option that I may refuse to participate or withdraw my participation from the study without effecting my health care …	Dental caries	Diclofenac	Metrogyl	Incorrect Dosage	Textbook	Yes	Yes	Yes	Yes	Yes
2023-05-11 10:48:43	You are a final year dental student in College	Sruthy Lekshmi, 24	I agree to participate in this study with my own wish. I have read and understood the information given by the investigator about the study and it has been explained to me in my own language.	Dental caries	Diclofenac	Metrogyl	Incompatibilities/Drug interactions	Textbook	Yes	Yes	Yes	Yes	Yes
2023-05-11 10:52:21	You are a final year dental student in College	Anjana Rajesh	I agree to participate in this study with my own wish. I have read and understood the information given by the investigator about the study and it has been explained to me in my own language., I understand that my participation is voluntary and free of coercion., I have been given option that I may refuse to participate or withdraw my participation from the study without effecting my health care …	Tooth Sensitivity	Paracetamol	Amoxicillin	Incorrect Dosage	Textbook	Yes	Yes	Yes	Yes	Yes
2023-05-11 11:05:18	You are a final year dental student in College	Anudhana k p, 23	I agree to participate in this study with my own wish. I have read and understood the information given by the investigator about the study and it has been explained to me in my own language.	Dental caries	Paracetamol	Amoxicillin and Clavulanic acid combination	Incorrect Dosage	Textbook	Yes	Yes	Yes	Yes	Yes
2023-05-11 11:06:24	You are a final year dental student in College	Harish 24	I agree to participate in this study with my own wish. I have read and understood the information given by the investigator about the study and it has been explained to me in my own language., I understand that my participation is voluntary and free of coercion., I have been given option that I may refuse to participate or withdraw my participation from the study without effecting my health care …	Dental caries	Paracetamol	Amoxicillin	Incorrect Dosage	Textbook	Yes	No	No	Yes	No
2023-05-11 11:26:37	You are a final year dental student in College	Justin. Age :23	I agree to participate in this study with my own wish. I have read and understood the information given by the investigator about the study and it has been explained to me in my own language., I understand that my participation is voluntary and free of coercion., I have been given option that I may refuse to participate or withdraw my participation from the study without effecting my health care …	Dental caries	Paracetamol	Amoxicillin	Incorrect Dosage	Textbook	Yes	No	No	Yes	No
2023-05-11 17:20:37	You are a final year dental student in College	Rahul gopi	I agree to participate in this study with my own wish. I have read and understood the information given by the investigator about the study and it has been explained to me in my own language., I understand that my participation is voluntary and free of coercion., I have been given option that I may refuse to participate or withdraw my participation from the study without effecting my health care …	Dental caries	Paracetamol	Amoxicillin	Incorrect Dosage	Textbook	Yes	No	No	Yes	No
2023-05-11 19:10:00	You are a final year dental student in College	Meenu lavan	I agree to participate in this study with my own wish. I have read and understood the information given by the investigator about the study and it has been explained to me in my own language.	Dental caries	Paracetamol	Amoxicillin	Incorrect Dosage	Textbook	Yes	No	No	Yes	No
2023-05-12 23:35:52	You are a final year dental student in College	Anjitha, 25	I agree to participate in this study with my own wish. I have read and understood the information given by the investigator about the study and it has been explained to me in my own language., I understand that my participation is voluntary and free of coercion., I have been given option that I may refuse to participate or withdraw my participation from the study without effecting my health care …	Dental caries	Paracetamol	Amoxicillin	Incorrect Dosage	Textbook	Yes	No	No	Yes	No
2023-05-18 22:45:32	You are a final year dental student in College	Jithin S Gilbert 23	I agree to participate in this study with my own wish. I have read and understood the information given by the investigator about the study and it has been explained to me in my own language., I understand that my participation is voluntary and free of coercion., I have been given option that I may refuse to participate or withdraw my participation from the study without effecting my health care …	Dental caries	Paracetamol	Amoxicillin	Incorrect Dosage	Textbook	Yes	No	No	Yes	No
2023-05-19 12:32:28	You are a final year dental student in College	Haripriya 23	I agree to participate in this study with my own wish. I have read and understood the information given by the investigator about the study and it has been explained to me in my own language., I understand that my participation is voluntary and free of coercion., I have been given option that I may refuse to participate or withdraw my participation from the study without effecting my health care …	Dental caries	Paracetamol	Amoxicillin	Incorrect Dosage	Textbook	Yes	No	No	Yes	No
2023-05-19 15:19:28	You are a final year dental student in College	Janusree 23	I agree to participate in this study with my own wish. I have read and understood the information given by the investigator about the study and it has been explained to me in my own language.	Dental caries	Paracetamol	Amoxicillin	Incorrect Dosage	Textbook	Yes	No	No	Yes	No
2023-05-24 09:05:25	You are a house surgeon in college	Anjan Ravi, 25 years old	I agree to participate in this study with my own wish. I have read and understood the information given by the investigator about the study and it has been explained to me in my own language., I understand that my participation is voluntary and free of coercion., I have been given option that I may refuse to participate or withdraw my participation from the study without effecting my health care …	Dental Pain	Paracetamol	Amoxicillin	Incorrect Dosage	Colleagues	No	No	Yes	No	Yes
2023-05-24 09:06:52	You are a house surgeon in college	Ashna shihab ; 25 yrs	I agree to participate in this study with my own wish. I have read and understood the information given by the investigator about the study and it has been explained to me in my own language., I understand that my participation is voluntary and free of coercion., I have been given option that I may refuse to participate or withdraw my participation from the study without effecting my health care …	Dental Pain	Paracetamol	Amoxicillin	Incorrect Dosage	Colleagues	Yes	No	No	Yes	Yes
2023-05-24 09:12:27	You are a house surgeon in college	Aysha	I agree to participate in this study with my own wish. I have read and understood the information given by the investigator about the study and it has been explained to me in my own language., I understand that my participation is voluntary and free of coercion., I have been given option that I may refuse to participate or withdraw my participation from the study without effecting my health care …	Dental Pain	Paracetamol	Amoxicillin	Incorrect Dosage	Colleagues	Yes	No	Yes	Yes	Yes
2023-05-24 09:14:18	You are a house surgeon in college	Dr Vivek S and 27	I agree to participate in this study with my own wish. I have read and understood the information given by the investigator about the study and it has been explained to me in my own language., I understand that my participation is voluntary and free of coercion., I have been given option that I may refuse to participate or withdraw my participation from the study without effecting my health care …	Dental Pain	Diclofenac	Amoxicillin and Clavulanic acid combination	Incompatibilities/Drug interactions	Others	Yes	Yes	Yes	Yes	Yes
2023-05-24 09:14:18	You are a house surgeon in college	Amala Joshy, 25	I agree to participate in this study with my own wish. I have read and understood the information given by the investigator about the study and it has been explained to me in my own language., I understand that my participation is voluntary and free of coercion., I have been given option that I may refuse to participate or withdraw my participation from the study without effecting my health care …	Dental Pain	Diclofenac	Amoxicillin and Clavulanic acid combination	Incompatibilities/Drug interactions	Professors	Yes	Yes	Yes	Yes	Yes
2023-05-24 09:14:32	You are a house surgeon in college	Rahi Ramesh 23 yrs	I agree to participate in this study with my own wish. I have read and understood the information given by the investigator about the study and it has been explained to me in my own language.	Dental caries	Diclofenac	Amoxicillin and Clavulanic acid combination	Incorrect Dosage	Professors	No	Yes	Yes	Yes	Yes
2023-05-24 09:49:48	You are a house surgeon in college	Shabnam and 25	I agree to participate in this study with my own wish. I have read and understood the information given by the investigator about the study and it has been explained to me in my own language.	Dental caries	Paracetamol	Amoxicillin	Incompatibilities/Drug interactions	Colleagues	Yes	Yes	Yes	Yes	Yes
2023-06-01 22:17:32	You are a final year dental student in College	Joel 23	I agree to participate in this study with my own wish. I have read and understood the information given by the investigator about the study and it has been explained to me in my own language., I understand that my participation is voluntary and free of coercion., I have been given option that I may refuse to participate or withdraw my participation from the study without effecting my health care …	Dental caries	Paracetamol	Amoxicillin	Incorrect Dosage	Textbook	Yes	No	No	Yes	No
2023-06-01 22:23:23	You are a final year dental student in College	Cerin Thomas, 23	I agree to participate in this study with my own wish. I have read and understood the information given by the investigator about the study and it has been explained to me in my own language., I understand that my participation is voluntary and free of coercion., I have been given option that I may refuse to participate or withdraw my participation from the study without effecting my health care …	Dental caries	Paracetamol	Amoxicillin	Incorrect Dosage	Textbook	Yes	No	No	Yes	No
2023-06-01 22:23:36	You are a final year dental student in College	Aswin	I agree to participate in this study with my own wish. I have read and understood the information given by the investigator about the study and it has been explained to me in my own language., I understand that my participation is voluntary and free of coercion., I have been given option that I may refuse to participate or withdraw my participation from the study without effecting my health care …	Dental caries	Paracetamol	Amoxicillin	Incorrect Dosage	Textbook	Yes	No	No	Yes	Yes
2023-06-01 22:24:47	You are a final year dental student in College	Harikrishna	I understand that my participation is voluntary and free of coercion.	Dental caries	Paracetamol	Amoxicillin	Incorrect Dosage	Textbook	Yes	No	No	Yes	No
2023-06-01 22:25:28	You are a final year dental student in College	Riswan 22	I agree to participate in this study with my own wish. I have read and understood the information given by the investigator about the study and it has been explained to me in my own language., I understand that my participation is voluntary and free of coercion., I have been given option that I may refuse to participate or withdraw my participation from the study without effecting my health care …	Dental Pain	Paracetamol	Amoxicillin	Incorrect Dosage	Textbook	No	Yes	Yes	No	Yes
2023-06-01 22:26:41	You are a final year dental student in College	Hannah Shaji 22	I agree to participate in this study with my own wish. I have read and understood the information given by the investigator about the study and it has been explained to me in my own language., I understand that my participation is voluntary and free of coercion., I have been given option that I may refuse to participate or withdraw my participation from the study without effecting my health care …	Dental Pain	Paracetamol	Amoxicillin	Incorrect Dosage	Textbook	Yes	Yes	No	No	Yes
2023-06-01 22:27:04	You are a final year dental student in College	Aromal l r	I agree to participate in this study with my own wish. I have read and understood the information given by the investigator about the study and it has been explained to me in my own language., I understand that my participation is voluntary and free of coercion., I have been given option that I may refuse to participate or withdraw my participation from the study without effecting my health care …	Dental caries	Paracetamol	Amoxicillin	Incorrect Dosage	Textbook	Yes	No	No	Yes	No
2023-06-01 22:28:11	You are a house surgeon in college	Aromal 23	I agree to participate in this study with my own wish. I have read and understood the information given by the investigator about the study and it has been explained to me in my own language., I understand that my participation is voluntary and free of coercion., I have been given option that I may refuse to participate or withdraw my participation from the study without effecting my health care …	Dental caries	Paracetamol	Amoxicillin	Incorrect Dosage	Textbook	Yes	No	No	Yes	No
2023-06-01 22:28:23	You are a final year dental student in College	Surya 21	I agree to participate in this study with my own wish. I have read and understood the information given by the investigator about the study and it has been explained to me in my own language., I understand that my participation is voluntary and free of coercion., I have been given option that I may refuse to participate or withdraw my participation from the study without effecting my health care …	Dental caries	Diclofenac	Amoxicillin and Clavulanic acid combination	Incorrect Dosage	Professors	Yes	No	Yes	Yes	No
2023-06-01 22:29:12	You are a final year dental student in College	Steve 21	I agree to participate in this study with my own wish. I have read and understood the information given by the investigator about the study and it has been explained to me in my own language., I understand that my participation is voluntary and free of coercion., I have been given option that I may refuse to participate or withdraw my participation from the study without effecting my health care …	Dental caries	Diclofenac	Amoxicillin	Incompatibilities/Drug interactions	Textbook	Yes	No	Yes	Yes	Yes
2023-06-01 22:29:19	You are a final year dental student in College	Rachel 22	I agree to participate in this study with my own wish. I have read and understood the information given by the investigator about the study and it has been explained to me in my own language., I understand that my participation is voluntary and free of coercion., I have been given option that I may refuse to participate or withdraw my participation from the study without effecting my health care …	Dental caries	Paracetamol	Amoxicillin	Incorrect Dosage	Professors	Yes	No	No	Yes	No
2023-06-01 22:29:55	You are a house surgeon in college	Anurag 23	I agree to participate in this study with my own wish. I have read and understood the information given by the investigator about the study and it has been explained to me in my own language., I understand that my participation is voluntary and free of coercion., I have been given option that I may refuse to participate or withdraw my participation from the study without effecting my health care …	Dental Pain	Others	Amoxicillin and Clavulanic acid combination	Incorrect Dosage	Colleagues	No	Yes	No	Yes	Yes
2023-06-01 22:30:24	You are a house surgeon in college	Rohith 22	I agree to participate in this study with my own wish. I have read and understood the information given by the investigator about the study and it has been explained to me in my own language., I understand that my participation is voluntary and free of coercion., I have been given option that I may refuse to participate or withdraw my participation from the study without effecting my health care …	Dental caries	Paracetamol	Amoxicillin	Incorrect Dosage	Textbook	Yes	No	No	Yes	No
2023-06-01 22:30:45	You are a final year dental student in College	Devan 22	I agree to participate in this study with my own wish. I have read and understood the information given by the investigator about the study and it has been explained to me in my own language., I understand that my participation is voluntary and free of coercion., I have been given option that I may refuse to participate or withdraw my participation from the study without effecting my health care …	Dental Pain	Paracetamol	Amoxicillin	Incorrect Dosage	Textbook	No	Yes	Yes	No	Yes
2023-06-01 22:31:10	You are a final year dental student in College	Karthik 22	I agree to participate in this study with my own wish. I have read and understood the information given by the investigator about the study and it has been explained to me in my own language., I understand that my participation is voluntary and free of coercion., I have been given option that I may refuse to participate or withdraw my participation from the study without effecting my health care …	Dental caries	Paracetamol	Amoxicillin	Incorrect Dosage	Textbook	Yes	No	No	Yes	No
2023-06-01 22:32:14	You are a final year dental student in College	Kiran Raj	I agree to participate in this study with my own wish. I have read and understood the information given by the investigator about the study and it has been explained to me in my own language., I understand that my participation is voluntary and free of coercion., I have been given option that I may refuse to participate or withdraw my participation from the study without effecting my health care …	Dental Pain	Paracetamol	Amoxicillin	Incorrect Dosage	Textbook	Yes	Yes	Yes	Yes	Yes
2023-06-01 22:34:02	You are a house surgeon in college	Reshma S 22	I agree to participate in this study with my own wish. I have read and understood the information given by the investigator about the study and it has been explained to me in my own language., I understand that my participation is voluntary and free of coercion., I have been given option that I may refuse to participate or withdraw my participation from the study without effecting my health care …	Dental Pain	Paracetamol	Amoxicillin	Incorrect Dosage	Textbook	Yes	No	Yes	No	Yes
2023-06-01 22:34:55	You are a final year dental student in College	Ashna R	I agree to participate in this study with my own wish. I have read and understood the information given by the investigator about the study and it has been explained to me in my own language., I understand that my participation is voluntary and free of coercion., I have been given option that I may refuse to participate or withdraw my participation from the study without effecting my health care …	Dental Pain	Paracetamol	Amoxicillin	Incorrect Dosage	Textbook	Yes	Yes	Yes	No	Yes
2023-06-01 22:36:44	You are a final year dental student in College	GOKUL G 22	I agree to participate in this study with my own wish. I have read and understood the information given by the investigator about the study and it has been explained to me in my own language., I understand that my participation is voluntary and free of coercion., I have been given option that I may refuse to participate or withdraw my participation from the study without effecting my health care …	Dental caries	Paracetamol	Amoxicillin	Incorrect Dosage	Textbook	Yes	No	No	Yes	No
2023-06-01 22:36:48	You are a final year dental student in College	Aravind	I agree to participate in this study with my own wish. I have read and understood the information given by the investigator about the study and it has been explained to me in my own language., I understand that my participation is voluntary and free of coercion., I have been given option that I may refuse to participate or withdraw my participation from the study without effecting my health care …	Dental Pain	Diclofenac	Amoxicillin	Incorrect Dosage	Professors	No	No	Yes	No	Yes
2023-06-01 22:36:51	You are a final year dental student in College	Tessy 21	I agree to participate in this study with my own wish. I have read and understood the information given by the investigator about the study and it has been explained to me in my own language., I understand that my participation is voluntary and free of coercion., I have been given option that I may refuse to participate or withdraw my participation from the study without effecting my health care …	Dental caries	Diclofenac	Amoxicillin and Clavulanic acid combination	Incorrect Dosage	Colleagues	Yes	Yes	Yes	Yes	Yes
2023-06-01 22:38:44	You are a final year dental student in College	Gouri	I agree to participate in this study with my own wish. I have read and understood the information given by the investigator about the study and it has been explained to me in my own language.	Tooth Sensitivity	Diclofenac	Others	Incorrect Dosage	Professors	No	No	No	Yes	Yes
2023-06-01 22:40:20	You are a house surgeon in college	Sreelekshmi 23	I agree to participate in this study with my own wish. I have read and understood the information given by the investigator about the study and it has been explained to me in my own language., I understand that my participation is voluntary and free of coercion., I have been given option that I may refuse to participate or withdraw my participation from the study without effecting my health care …	Dental Pain	Paracetamol	Amoxicillin	Incorrect Dosage	Textbook	Yes	Yes	Yes	Yes	Yes
2023-06-01 22:40:59	You are a final year dental student in College	Haifa 22	I agree to participate in this study with my own wish. I have read and understood the information given by the investigator about the study and it has been explained to me in my own language., I understand that my participation is voluntary and free of coercion., I have been given option that I may refuse to participate or withdraw my participation from the study without effecting my health care …	Dental Pain	Paracetamol	Amoxicillin	Incompatibilities/Drug interactions	Professors	Yes	No	Yes	Yes	Yes
2023-06-01 22:41:47	You are a final year dental student in College	Fathima H 22	I agree to participate in this study with my own wish. I have read and understood the information given by the investigator about the study and it has been explained to me in my own language., I understand that my participation is voluntary and free of coercion., I have been given option that I may refuse to participate or withdraw my participation from the study without effecting my health care …	Dental Pain	Paracetamol	Amoxicillin and Clavulanic acid combination	Incorrect Dosage	Textbook	Yes	No	No	Yes	Yes
2023-06-01 22:42:38	You are a final year dental student in College	Vishnu 22	I agree to participate in this study with my own wish. I have read and understood the information given by the investigator about the study and it has been explained to me in my own language., I understand that my participation is voluntary and free of coercion., I have been given option that I may refuse to participate or withdraw my participation from the study without effecting my health care …	Dental caries	Paracetamol	Amoxicillin	Incorrect Dosage	Textbook	Yes	Yes	Yes	Yes	Yes
2023-06-01 22:44:08	You are a final year dental student in College	Jijin 23	I agree to participate in this study with my own wish. I have read and understood the information given by the investigator about the study and it has been explained to me in my own language., I understand that my participation is voluntary and free of coercion., I have been given option that I may refuse to participate or withdraw my participation from the study without effecting my health care …	Tooth Sensitivity	Diclofenac	Amoxicillin and Clavulanic acid combination	Incompatibilities/Drug interactions	Textbook	Yes	No	Yes	Yes	Yes
2023-06-01 22:44:49	You are a final year dental student in College	Divya 22	I agree to participate in this study with my own wish. I have read and understood the information given by the investigator about the study and it has been explained to me in my own language., I understand that my participation is voluntary and free of coercion., I have been given option that I may refuse to participate or withdraw my participation from the study without effecting my health care …	Dental Pain	Paracetamol	Amoxicillin	Incorrect Dosage	Textbook	Yes	No	No	Yes	Yes
2023-06-01 22:45:52	You are a final year dental student in College	Dilshana 22	I agree to participate in this study with my own wish. I have read and understood the information given by the investigator about the study and it has been explained to me in my own language., I understand that my participation is voluntary and free of coercion., I have been given option that I may refuse to participate or withdraw my participation from the study without effecting my health care …	Dental Pain	Paracetamol	Amoxicillin	Incorrect Dosage	Textbook	Yes	No	Yes	Yes	Yes
2023-06-01 22:46:56	You are a final year dental student in College	Hameema 23	I agree to participate in this study with my own wish. I have read and understood the information given by the investigator about the study and it has been explained to me in my own language., I understand that my participation is voluntary and free of coercion., I have been given option that I may refuse to participate or withdraw my participation from the study without effecting my health care …	Dental Pain	Paracetamol	Amoxicillin	Incorrect Dosage	Textbook	Yes	No	No	Yes	Yes
2023-06-01 22:47:40	You are a house surgeon in college	Ajmi 22	I agree to participate in this study with my own wish. I have read and understood the information given by the investigator about the study and it has been explained to me in my own language., I understand that my participation is voluntary and free of coercion., I have been given option that I may refuse to participate or withdraw my participation from the study without effecting my health care …	Dental Pain	Paracetamol	Amoxicillin	Incorrect Dosage	Textbook	Yes	No	Yes	Yes	Yes
2023-06-01 22:48:20	You are a final year dental student in College	Bipin 22	I agree to participate in this study with my own wish. I have read and understood the information given by the investigator about the study and it has been explained to me in my own language., I understand that my participation is voluntary and free of coercion., I have been given option that I may refuse to participate or withdraw my participation from the study without effecting my health care …	Dental Pain	Paracetamol	Amoxicillin	Incorrect Dosage	Textbook	Yes	No	No	Yes	Yes
2023-06-01 22:49:42	You are a final year dental student in College	Hari	I agree to participate in this study with my own wish. I have read and understood the information given by the investigator about the study and it has been explained to me in my own language.	Dental caries	Diclofenac	Amoxicillin	Incorrect name of the drug	Colleagues	Yes	Yes	Yes	No	Yes
2023-06-01 22:49:51	You are a house surgeon in college	Visakh 23	I agree to participate in this study with my own wish. I have read and understood the information given by the investigator about the study and it has been explained to me in my own language., I understand that my participation is voluntary and free of coercion., I have been given option that I may refuse to participate or withdraw my participation from the study without effecting my health care …	Dental caries	Aceclofenac	Amoxicillin and Clavulanic acid combination	Incompatibilities/Drug interactions	Colleagues	Yes	Yes	Yes	Yes	Yes
2023-06-01 22:50:17	You are a final year dental student in College	Kiran	I understand that my participation is voluntary and free of coercion.	Dental Pain	Diclofenac	Metrogyl	Incompatibilities/Drug interactions	Textbook	Yes	Yes	No	Yes	Yes
2023-06-01 22:50:30	You are a house surgeon in college	Isha 23	I agree to participate in this study with my own wish. I have read and understood the information given by the investigator about the study and it has been explained to me in my own language., I understand that my participation is voluntary and free of coercion., I have been given option that I may refuse to participate or withdraw my participation from the study without effecting my health care …	Dental Pain	Paracetamol	Amoxicillin	Incorrect Dosage	Textbook	Yes	Yes	No	Yes	Yes
2023-06-01 22:51:08	You are a final year dental student in College	Jisha 23	I agree to participate in this study with my own wish. I have read and understood the information given by the investigator about the study and it has been explained to me in my own language., I understand that my participation is voluntary and free of coercion., I have been given option that I may refuse to participate or withdraw my participation from the study without effecting my health care …	Dental Pain	Paracetamol	Amoxicillin	Incorrect Dosage	Textbook	No	No	Yes	No	No
2023-06-01 22:51:53	You are a final year dental student in College	Donitta 23	I agree to participate in this study with my own wish. I have read and understood the information given by the investigator about the study and it has been explained to me in my own language., I understand that my participation is voluntary and free of coercion., I have been given option that I may refuse to participate or withdraw my participation from the study without effecting my health care …	Dental caries	Paracetamol	Amoxicillin and Clavulanic acid combination	Incompatibilities/Drug interactions	Professors	No	Yes	Yes	Yes	No
2023-06-01 22:52:35	You are a final year dental student in College	Priya 22	I agree to participate in this study with my own wish. I have read and understood the information given by the investigator about the study and it has been explained to me in my own language., I understand that my participation is voluntary and free of coercion., I have been given option that I may refuse to participate or withdraw my participation from the study without effecting my health care …	Tooth Sensitivity	Paracetamol	Amoxicillin	Incorrect Dosage	Textbook	Yes	Yes	Yes	Yes	Yes
2023-06-01 22:53:13	You are a final year dental student in College	Vaishnavi 23	I agree to participate in this study with my own wish. I have read and understood the information given by the investigator about the study and it has been explained to me in my own language., I understand that my participation is voluntary and free of coercion., I have been given option that I may refuse to participate or withdraw my participation from the study without effecting my health care …	Dental Pain	Aceclofenac	Amoxicillin and Clavulanic acid combination	Incompatibilities/Drug interactions	Professors	No	No	Yes	Yes	Yes
2023-06-01 22:53:55	You are a final year dental student in College	Safwana 22	I agree to participate in this study with my own wish. I have read and understood the information given by the investigator about the study and it has been explained to me in my own language., I understand that my participation is voluntary and free of coercion., I have been given option that I may refuse to participate or withdraw my participation from the study without effecting my health care …	Dental Pain	Diclofenac	Amoxicillin	Incorrect Dosage	Textbook	Yes	Yes	Yes	Yes	Yes
2023-06-01 22:54:30	You are a final year dental student in College	Haris, 22	I agree to participate in this study with my own wish. I have read and understood the information given by the investigator about the study and it has been explained to me in my own language., I understand that my participation is voluntary and free of coercion., I have been given option that I may refuse to participate or withdraw my participation from the study without effecting my health care …	Dental caries	Paracetamol	Amoxicillin	Incorrect Dosage	Textbook	Yes	No	No	Yes	No
2023-06-01 22:54:31	You are a house surgeon in college	Riya 24	I agree to participate in this study with my own wish. I have read and understood the information given by the investigator about the study and it has been explained to me in my own language., I understand that my participation is voluntary and free of coercion., I have been given option that I may refuse to participate or withdraw my participation from the study without effecting my health care …	Dental Pain	Paracetamol	Amoxicillin	Incorrect Dosage	Textbook	Yes	Yes	Yes	Yes	Yes
2023-06-01 22:55:08	You are a house surgeon in college	Aliya 23	I agree to participate in this study with my own wish. I have read and understood the information given by the investigator about the study and it has been explained to me in my own language., I understand that my participation is voluntary and free of coercion., I have been given option that I may refuse to participate or withdraw my participation from the study without effecting my health care …	Dental Pain	Paracetamol	Amoxicillin	Incorrect Dosage	Textbook	Yes	Yes	Yes	No	Yes
2023-06-01 22:55:41	You are a house surgeon in college	Krishna 23	I agree to participate in this study with my own wish. I have read and understood the information given by the investigator about the study and it has been explained to me in my own language., I understand that my participation is voluntary and free of coercion., I have been given option that I may refuse to participate or withdraw my participation from the study without effecting my health care …	Dental Pain	Paracetamol	Amoxicillin	Incorrect Dosage	Textbook	Yes	Yes	Yes	Yes	Yes
2023-06-01 22:57:48	You are a final year dental student in College	shruthi 23	I agree to participate in this study with my own wish. I have read and understood the information given by the investigator about the study and it has been explained to me in my own language., I understand that my participation is voluntary and free of coercion., I have been given option that I may refuse to participate or withdraw my participation from the study without effecting my health care …	Dental Pain	Paracetamol	Amoxicillin	Incorrect Dosage	Textbook	Yes	Yes	No	Yes	Yes
2023-06-01 22:58:38	You are a final year dental student in College	Kavya 23	I agree to participate in this study with my own wish. I have read and understood the information given by the investigator about the study and it has been explained to me in my own language., I understand that my participation is voluntary and free of coercion., I have been given option that I may refuse to participate or withdraw my participation from the study without effecting my health care …	Dental Pain	Paracetamol	Amoxicillin	Incorrect name of the drug	Textbook	Yes	Yes	Yes	Yes	Yes
2023-06-01 22:59:37	You are a house surgeon in college	Rini 23	I agree to participate in this study with my own wish. I have read and understood the information given by the investigator about the study and it has been explained to me in my own language., I understand that my participation is voluntary and free of coercion., I have been given option that I may refuse to participate or withdraw my participation from the study without effecting my health care …	Dental Pain	Paracetamol	Amoxicillin	Incorrect Dosage	Textbook	Yes	Yes	Yes	Yes	Yes
2023-06-01 23:00:13	You are a house surgeon in college	Aparna 23	I agree to participate in this study with my own wish. I have read and understood the information given by the investigator about the study and it has been explained to me in my own language., I understand that my participation is voluntary and free of coercion., I have been given option that I may refuse to participate or withdraw my participation from the study without effecting my health care …	Dental Pain	Paracetamol	Amoxicillin	Incorrect Dosage	Textbook	Yes	No	Yes	Yes	Yes
2023-06-01 23:00:50	You are a house surgeon in college	Praveen 24	I agree to participate in this study with my own wish. I have read and understood the information given by the investigator about the study and it has been explained to me in my own language., I understand that my participation is voluntary and free of coercion., I have been given option that I may refuse to participate or withdraw my participation from the study without effecting my health care …	Dental Pain	Paracetamol	Amoxicillin	Incorrect Dosage	Textbook	Yes	Yes	Yes	Yes	Yes
2023-06-01 23:00:59	You are a final year dental student in College	Shankar and 23	I understand that my participation is voluntary and free of coercion.	Dental caries	Paracetamol	Amoxicillin	Incorrect Dosage	Textbook	Yes	No	No	Yes	No
2023-06-01 23:01:50	You are a house surgeon in college	Krishna 23	I agree to participate in this study with my own wish. I have read and understood the information given by the investigator about the study and it has been explained to me in my own language., I understand that my participation is voluntary and free of coercion., I have been given option that I may refuse to participate or withdraw my participation from the study without effecting my health care …	Dental Pain	Paracetamol	Amoxicillin	Incorrect Dosage	Textbook	Yes	Yes	Yes	Yes	Yes
2023-06-01 23:02:12	You are a final year dental student in College	Afiz - 22	I agree to participate in this study with my own wish. I have read and understood the information given by the investigator about the study and it has been explained to me in my own language.	Dental caries	Paracetamol	Amoxicillin	Incorrect Dosage	Textbook	Yes	No	No	Yes	No
2023-06-01 23:03:11	You are a house surgeon in college	Ivana 23	I agree to participate in this study with my own wish. I have read and understood the information given by the investigator about the study and it has been explained to me in my own language., I understand that my participation is voluntary and free of coercion., I have been given option that I may refuse to participate or withdraw my participation from the study without effecting my health care …	Dental Pain	Paracetamol	Amoxicillin	Incorrect Dosage	Colleagues	Yes	No	Yes	Yes	Yes
2023-06-01 23:03:55	You are a house surgeon in college	Ajay 23	I agree to participate in this study with my own wish. I have read and understood the information given by the investigator about the study and it has been explained to me in my own language., I understand that my participation is voluntary and free of coercion., I have been given option that I may refuse to participate or withdraw my participation from the study without effecting my health care …	Dental caries	Paracetamol	Amoxicillin	Incorrect Dosage	Textbook	Yes	No	No	Yes	No
2023-06-01 23:04:16	You are a final year dental student in College	Reena 23	I agree to participate in this study with my own wish. I have read and understood the information given by the investigator about the study and it has been explained to me in my own language., I understand that my participation is voluntary and free of coercion., I have been given option that I may refuse to participate or withdraw my participation from the study without effecting my health care …	Dental Pain	Paracetamol	Amoxicillin	Incorrect Dosage	Textbook	Yes	Yes	Yes	Yes	Yes
2023-06-01 23:04:43	You are a final year dental student in College	Abi 23	I agree to participate in this study with my own wish. I have read and understood the information given by the investigator about the study and it has been explained to me in my own language., I understand that my participation is voluntary and free of coercion., I have been given option that I may refuse to participate or withdraw my participation from the study without effecting my health care …	Dental caries	Paracetamol	Amoxicillin	Incorrect Dosage	Textbook	Yes	No	No	Yes	No
2023-06-01 23:05:05	You are a final year dental student in College	Gayatri 23	I agree to participate in this study with my own wish. I have read and understood the information given by the investigator about the study and it has been explained to me in my own language., I understand that my participation is voluntary and free of coercion., I have been given option that I may refuse to participate or withdraw my participation from the study without effecting my health care …	Dental Pain	Paracetamol	Amoxicillin	Incorrect Dosage	Textbook	Yes	Yes	Yes	Yes	Yes
2023-06-01 23:05:36	You are a house surgeon in college	Hari S 22	I agree to participate in this study with my own wish. I have read and understood the information given by the investigator about the study and it has been explained to me in my own language., I understand that my participation is voluntary and free of coercion., I have been given option that I may refuse to participate or withdraw my participation from the study without effecting my health care …	Dental caries	Paracetamol	Amoxicillin	Incorrect Dosage	Textbook	Yes	No	No	Yes	No
2023-06-01 23:05:42	You are a house surgeon in college	Tom 23	I agree to participate in this study with my own wish. I have read and understood the information given by the investigator about the study and it has been explained to me in my own language., I understand that my participation is voluntary and free of coercion., I have been given option that I may refuse to participate or withdraw my participation from the study without effecting my health care …	Dental Pain	Paracetamol	Amoxicillin and Clavulanic acid combination	Incompatibilities/Drug interactions	Colleagues	Yes	Yes	Yes	Yes	Yes
2023-06-01 23:06:14	You are a final year dental student in College	Akshay 23	I agree to participate in this study with my own wish. I have read and understood the information given by the investigator about the study and it has been explained to me in my own language., I understand that my participation is voluntary and free of coercion., I have been given option that I may refuse to participate or withdraw my participation from the study without effecting my health care …	Dental Pain	Paracetamol	Amoxicillin	Incorrect Dosage	Textbook	Yes	Yes	Yes	Yes	Yes
2023-06-01 23:06:29	You are a house surgeon in college	Arya 24	I agree to participate in this study with my own wish. I have read and understood the information given by the investigator about the study and it has been explained to me in my own language., I understand that my participation is voluntary and free of coercion., I have been given option that I may refuse to participate or withdraw my participation from the study without effecting my health care …	Dental caries	Paracetamol	Amoxicillin	Incorrect Dosage	Textbook	Yes	No	No	Yes	No
2023-06-01 23:06:55	You are a final year dental student in College	Teena 24	I agree to participate in this study with my own wish. I have read and understood the information given by the investigator about the study and it has been explained to me in my own language., I understand that my participation is voluntary and free of coercion., I have been given option that I may refuse to participate or withdraw my participation from the study without effecting my health care …	Dental Pain	Paracetamol	Amoxicillin	Incorrect Dosage	Textbook	Yes	Yes	Yes	Yes	Yes
2023-06-01 23:07:12	You are a final year dental student in College	Pranav 23	I agree to participate in this study with my own wish. I have read and understood the information given by the investigator about the study and it has been explained to me in my own language., I understand that my participation is voluntary and free of coercion., I have been given option that I may refuse to participate or withdraw my participation from the study without effecting my health care …	Dental caries	Paracetamol	Amoxicillin	Incorrect Dosage	Textbook	Yes	No	No	Yes	No
2023-06-01 23:07:38	You are a final year dental student in College	Rithika 23	I agree to participate in this study with my own wish. I have read and understood the information given by the investigator about the study and it has been explained to me in my own language., I understand that my participation is voluntary and free of coercion., I have been given option that I may refuse to participate or withdraw my participation from the study without effecting my health care …	Dental caries	Aceclofenac	Amoxicillin and Clavulanic acid combination	Incompatibilities/Drug interactions	Colleagues	Yes	No	No	Yes	Yes
2023-06-01 23:07:57	You are a final year dental student in College	Anagha 23	I agree to participate in this study with my own wish. I have read and understood the information given by the investigator about the study and it has been explained to me in my own language., I understand that my participation is voluntary and free of coercion., I have been given option that I may refuse to participate or withdraw my participation from the study without effecting my health care …	Dental caries	Paracetamol	Amoxicillin	Incorrect Dosage	Textbook	Yes	No	No	Yes	No
2023-06-01 23:08:21	You are a house surgeon in college	Krishnajith 23	I agree to participate in this study with my own wish. I have read and understood the information given by the investigator about the study and it has been explained to me in my own language., I understand that my participation is voluntary and free of coercion., I have been given option that I may refuse to participate or withdraw my participation from the study without effecting my health care …	Dental Pain	Paracetamol	Amoxicillin	Incompatibilities/Drug interactions	Textbook	Yes	Yes	Yes	Yes	Yes
2023-06-01 23:08:57	You are a final year dental student in College	Vysakh 21	I agree to participate in this study with my own wish. I have read and understood the information given by the investigator about the study and it has been explained to me in my own language., I understand that my participation is voluntary and free of coercion., I have been given option that I may refuse to participate or withdraw my participation from the study without effecting my health care …	Tooth Sensitivity	Diclofenac	Amoxicillin and Clavulanic acid combination	Others	Textbook	Yes	Yes	Yes	Yes	Yes
2023-06-01 23:09:38	You are a house surgeon in college	George 23	I agree to participate in this study with my own wish. I have read and understood the information given by the investigator about the study and it has been explained to me in my own language., I understand that my participation is voluntary and free of coercion., I have been given option that I may refuse to participate or withdraw my participation from the study without effecting my health care …	Dental Pain	Paracetamol	Amoxicillin	Incorrect Dosage	Textbook	Yes	Yes	Yes	Yes	Yes
2023-06-01 23:10:49	You are a house surgeon in college	Greena 23	I agree to participate in this study with my own wish. I have read and understood the information given by the investigator about the study and it has been explained to me in my own language., I understand that my participation is voluntary and free of coercion., I have been given option that I may refuse to participate or withdraw my participation from the study without effecting my health care …	Dental Pain	Paracetamol	Amoxicillin	Incorrect Dosage	Textbook	Yes	Yes	Yes	Yes	Yes
2023-06-01 23:11:23	You are a house surgeon in college	Arun 23	I agree to participate in this study with my own wish. I have read and understood the information given by the investigator about the study and it has been explained to me in my own language., I understand that my participation is voluntary and free of coercion., I have been given option that I may refuse to participate or withdraw my participation from the study without effecting my health care …	Dental Pain	Paracetamol	Amoxicillin	Incorrect Dosage	Textbook	Yes	Yes	Yes	Yes	Yes
2023-06-01 23:12:00	You are a final year dental student in College	Elizabeth 23	I agree to participate in this study with my own wish. I have read and understood the information given by the investigator about the study and it has been explained to me in my own language., I understand that my participation is voluntary and free of coercion., I have been given option that I may refuse to participate or withdraw my participation from the study without effecting my health care …	Dental Pain	Paracetamol	Amoxicillin	Incorrect Dosage	Textbook	Yes	Yes	Yes	Yes	Yes
2023-06-01 23:12:34	You are a house surgeon in college	Elza 24	I agree to participate in this study with my own wish. I have read and understood the information given by the investigator about the study and it has been explained to me in my own language., I understand that my participation is voluntary and free of coercion., I have been given option that I may refuse to participate or withdraw my participation from the study without effecting my health care …	Dental Pain	Paracetamol	Amoxicillin	Incorrect Dosage	Textbook	Yes	Yes	Yes	Yes	Yes
2023-06-01 23:13:22	You are a final year dental student in College	Drishya 23	I agree to participate in this study with my own wish. I have read and understood the information given by the investigator about the study and it has been explained to me in my own language., I understand that my participation is voluntary and free of coercion., I have been given option that I may refuse to participate or withdraw my participation from the study without effecting my health care …	Dental caries	Diclofenac	Amoxicillin and Clavulanic acid combination	Others	Others	Yes	No	No	Yes	Yes
2023-06-01 23:13:56	You are a final year dental student in College	Adithyan 22	I agree to participate in this study with my own wish. I have read and understood the information given by the investigator about the study and it has been explained to me in my own language., I understand that my participation is voluntary and free of coercion., I have been given option that I may refuse to participate or withdraw my participation from the study without effecting my health care …	Dental Pain	Paracetamol	Amoxicillin	Incorrect Dosage	Textbook	Yes	Yes	Yes	Yes	Yes
2023-06-01 23:14:31	You are a house surgeon in college	Sheikha 23	I agree to participate in this study with my own wish. I have read and understood the information given by the investigator about the study and it has been explained to me in my own language., I understand that my participation is voluntary and free of coercion., I have been given option that I may refuse to participate or withdraw my participation from the study without effecting my health care …	Tooth Sensitivity	Diclofenac	Amoxicillin	Incorrect Dosage	Textbook	Yes	Yes	Yes	Yes	Yes
2023-06-01 23:15:09	You are a final year dental student in College	Ameen S 23	I agree to participate in this study with my own wish. I have read and understood the information given by the investigator about the study and it has been explained to me in my own language., I understand that my participation is voluntary and free of coercion., I have been given option that I may refuse to participate or withdraw my participation from the study without effecting my health care …	Dental Pain	Paracetamol	Amoxicillin	Incorrect Dosage	Textbook	Yes	Yes	Yes	Yes	Yes
2023-06-01 23:15:44	You are a final year dental student in College	Vaishnav MT 23	I agree to participate in this study with my own wish. I have read and understood the information given by the investigator about the study and it has been explained to me in my own language., I understand that my participation is voluntary and free of coercion., I have been given option that I may refuse to participate or withdraw my participation from the study without effecting my health care …	Dental caries	Paracetamol	Amoxicillin	Incorrect Dosage	Textbook	Yes	No	No	Yes	No
2023-06-01 23:16:56	You are a house surgeon in college	Shivani 23	I agree to participate in this study with my own wish. I have read and understood the information given by the investigator about the study and it has been explained to me in my own language., I understand that my participation is voluntary and free of coercion., I have been given option that I may refuse to participate or withdraw my participation from the study without effecting my health care …	Dental Pain	Paracetamol	Metrogyl	Incorrect Dosage	Textbook	Yes	No	Yes	No	Yes
2023-06-01 23:17:26	You are a house surgeon in college	Tara 23	I agree to participate in this study with my own wish. I have read and understood the information given by the investigator about the study and it has been explained to me in my own language., I understand that my participation is voluntary and free of coercion., I have been given option that I may refuse to participate or withdraw my participation from the study without effecting my health care …	Dental Pain	Paracetamol	Amoxicillin	Incorrect Dosage	Textbook	Yes	Yes	Yes	Yes	Yes
2023-06-01 23:17:53	You are a house surgeon in college	Rahul Rathna 24	I agree to participate in this study with my own wish. I have read and understood the information given by the investigator about the study and it has been explained to me in my own language., I understand that my participation is voluntary and free of coercion., I have been given option that I may refuse to participate or withdraw my participation from the study without effecting my health care …	Dental caries	Paracetamol	Amoxicillin	Incorrect Dosage	Textbook	Yes	No	No	Yes	No
2023-06-01 23:17:55	You are a house surgeon in college	Nikhil 23	I agree to participate in this study with my own wish. I have read and understood the information given by the investigator about the study and it has been explained to me in my own language., I understand that my participation is voluntary and free of coercion., I have been given option that I may refuse to participate or withdraw my participation from the study without effecting my health care …	Dental Pain	Paracetamol	Amoxicillin	Incorrect Dosage	Textbook	Yes	Yes	Yes	Yes	Yes
2023-06-01 23:18:33	You are a house surgeon in college	Viji 23	I agree to participate in this study with my own wish. I have read and understood the information given by the investigator about the study and it has been explained to me in my own language., I understand that my participation is voluntary and free of coercion., I have been given option that I may refuse to participate or withdraw my participation from the study without effecting my health care …	Dental Pain	Diclofenac	Others	Incorrect Dosage	Textbook	Yes	Yes	No	No	Yes
2023-06-01 23:19:06	You are a house surgeon in college	Dilna Krishnan	I agree to participate in this study with my own wish. I have read and understood the information given by the investigator about the study and it has been explained to me in my own language., I understand that my participation is voluntary and free of coercion., I have been given option that I may refuse to participate or withdraw my participation from the study without effecting my health care …	Dental caries	Paracetamol	Amoxicillin	Incorrect Dosage	Textbook	Yes	No	No	Yes	No
2023-06-01 23:19:09	You are a house surgeon in college	Akhil 23	I agree to participate in this study with my own wish. I have read and understood the information given by the investigator about the study and it has been explained to me in my own language., I understand that my participation is voluntary and free of coercion., I have been given option that I may refuse to participate or withdraw my participation from the study without effecting my health care …	Dental Pain	Paracetamol	Amoxicillin	Incorrect Dosage	Textbook	Yes	Yes	Yes	Yes	Yes
2023-06-01 23:20:12	You are a house surgeon in college	Vidhun 23	I agree to participate in this study with my own wish. I have read and understood the information given by the investigator about the study and it has been explained to me in my own language., I understand that my participation is voluntary and free of coercion., I have been given option that I may refuse to participate or withdraw my participation from the study without effecting my health care …	Dental Pain	Paracetamol	Amoxicillin	Incorrect Dosage	Textbook	Yes	Yes	Yes	Yes	Yes
2023-06-01 23:20:15	You are a final year dental student in College	Jishnu SK	I agree to participate in this study with my own wish. I have read and understood the information given by the investigator about the study and it has been explained to me in my own language., I understand that my participation is voluntary and free of coercion., I have been given option that I may refuse to participate or withdraw my participation from the study without effecting my health care …	Dental caries	Paracetamol	Amoxicillin	Incorrect Dosage	Textbook	Yes	No	No	Yes	No
2023-06-01 23:22:12	You are a final year dental student in College	Dinil CV 23	I agree to participate in this study with my own wish. I have read and understood the information given by the investigator about the study and it has been explained to me in my own language., I understand that my participation is voluntary and free of coercion., I have been given option that I may refuse to participate or withdraw my participation from the study without effecting my health care …	Dental caries	Paracetamol	Amoxicillin	Incorrect Dosage	Textbook	Yes	No	No	Yes	No
2023-06-01 23:22:48	You are a house surgeon in college	Veena 23	I agree to participate in this study with my own wish. I have read and understood the information given by the investigator about the study and it has been explained to me in my own language., I understand that my participation is voluntary and free of coercion., I have been given option that I may refuse to participate or withdraw my participation from the study without effecting my health care …	Dental Pain	Paracetamol	Amoxicillin	Incorrect Dosage	Textbook	Yes	Yes	No	Yes	No
2023-06-02 06:25:14	You are a house surgeon in college	Abel 22	I agree to participate in this study with my own wish. I have read and understood the information given by the investigator about the study and it has been explained to me in my own language., I understand that my participation is voluntary and free of coercion., I have been given option that I may refuse to participate or withdraw my participation from the study without effecting my health care …	Dental Pain	Diclofenac	Amoxicillin and Clavulanic acid combination	Incorrect Dosage	Textbook	Yes	No	No	No	Yes
2023-06-02 06:26:06	You are a final year dental student in College	Hadiya 22	I agree to participate in this study with my own wish. I have read and understood the information given by the investigator about the study and it has been explained to me in my own language., I understand that my participation is voluntary and free of coercion., I have been given option that I may refuse to participate or withdraw my participation from the study without effecting my health care …	Tooth Sensitivity	Diclofenac	Amoxicillin	Incorrect Dosage	Textbook	Yes	No	Yes	No	Yes
2023-06-02 08:09:13	You are a final year dental student in College	Aswathy, 20	I agree to participate in this study with my own wish. I have read and understood the information given by the investigator about the study and it has been explained to me in my own language., I understand that my participation is voluntary and free of coercion., I have been given option that I may refuse to participate or withdraw my participation from the study without effecting my health care …	Dental Pain	Paracetamol	Metrogyl	Incorrect name of the drug	Textbook	Yes	Yes	No	Yes	Yes
2023-06-02 08:09:34	You are a final year dental student in College	Aravind 22	I agree to participate in this study with my own wish. I have read and understood the information given by the investigator about the study and it has been explained to me in my own language., I understand that my participation is voluntary and free of coercion., I have been given option that I may refuse to participate or withdraw my participation from the study without effecting my health care …	Dental caries	Paracetamol	Amoxicillin	Incorrect Dosage	Others	No	No	Yes	No	No
2023-06-02 08:09:47	You are a house surgeon in college	Archa 23	I agree to participate in this study with my own wish. I have read and understood the information given by the investigator about the study and it has been explained to me in my own language., I understand that my participation is voluntary and free of coercion., I have been given option that I may refuse to participate or withdraw my participation from the study without effecting my health care …	Dental Pain	Paracetamol	Amoxicillin	Incorrect Dosage	Textbook	Yes	Yes	Yes	Yes	Yes
2023-06-02 08:10:17	You are a final year dental student in College	Anaswara, 19	I agree to participate in this study with my own wish. I have read and understood the information given by the investigator about the study and it has been explained to me in my own language., I understand that my participation is voluntary and free of coercion., I have been given option that I may refuse to participate or withdraw my participation from the study without effecting my health care …	Dental caries	Aceclofenac	Amoxicillin	Incorrect Dosage	Professors	Yes	No	No	Yes	Yes
2023-06-02 08:10:31	You are a house surgeon in college	Greeshma 23	I agree to participate in this study with my own wish. I have read and understood the information given by the investigator about the study and it has been explained to me in my own language., I understand that my participation is voluntary and free of coercion., I have been given option that I may refuse to participate or withdraw my participation from the study without effecting my health care …	Dental Pain	Paracetamol	Amoxicillin	Incorrect Dosage	Textbook	Yes	Yes	Yes	Yes	Yes
2023-06-02 08:10:32	You are a final year dental student in College	Shanto 22	I agree to participate in this study with my own wish. I have read and understood the information given by the investigator about the study and it has been explained to me in my own language., I understand that my participation is voluntary and free of coercion., I have been given option that I may refuse to participate or withdraw my participation from the study without effecting my health care …	Dental Pain	Diclofenac	Amoxicillin and Clavulanic acid combination	Incompatibilities/Drug interactions	Professors	No	No	Yes	Yes	No
2023-06-02 08:11:25	You are a house surgeon in college	Pretty 23	I agree to participate in this study with my own wish. I have read and understood the information given by the investigator about the study and it has been explained to me in my own language., I understand that my participation is voluntary and free of coercion., I have been given option that I may refuse to participate or withdraw my participation from the study without effecting my health care …	Tooth Sensitivity	Paracetamol	Metrogyl	Incorrect Dosage	Colleagues	No	Yes	No	No	No
2023-06-02 08:11:48	You are a final year dental student in College	Soumya, 22	I agree to participate in this study with my own wish. I have read and understood the information given by the investigator about the study and it has been explained to me in my own language., I understand that my participation is voluntary and free of coercion., I have been given option that I may refuse to participate or withdraw my participation from the study without effecting my health care …	Dental caries	Diclofenac	Amoxicillin and Clavulanic acid combination	Incorrect Dosage	Colleagues	Yes	No	No	No	Yes
2023-06-02 08:12:17	You are a house surgeon in college	Sruthi 23	I agree to participate in this study with my own wish. I have read and understood the information given by the investigator about the study and it has been explained to me in my own language., I understand that my participation is voluntary and free of coercion., I have been given option that I may refuse to participate or withdraw my participation from the study without effecting my health care …	Dental Pain	Diclofenac	Amoxicillin	Incorrect Dosage	Textbook	No	No	Yes	No	Yes
2023-06-02 08:12:54	You are a house surgeon in college	Sherin 22	I agree to participate in this study with my own wish. I have read and understood the information given by the investigator about the study and it has been explained to me in my own language., I understand that my participation is voluntary and free of coercion., I have been given option that I may refuse to participate or withdraw my participation from the study without effecting my health care …	Dental Pain	Aceclofenac	Metrogyl	Incorrect Dosage	Professors	No	No	No	Yes	Yes
2023-06-02 08:13:08	You are a house surgeon in college	Archana, 21	I agree to participate in this study with my own wish. I have read and understood the information given by the investigator about the study and it has been explained to me in my own language., I understand that my participation is voluntary and free of coercion., I have been given option that I may refuse to participate or withdraw my participation from the study without effecting my health care …	Dental caries	Aceclofenac	Amoxicillin	Incorrect Dosage	Textbook	No	Yes	No	Yes	Yes
2023-06-02 08:13:34	You are a final year dental student in College	Silpa 24	I agree to participate in this study with my own wish. I have read and understood the information given by the investigator about the study and it has been explained to me in my own language., I understand that my participation is voluntary and free of coercion., I have been given option that I may refuse to participate or withdraw my participation from the study without effecting my health care …	Dental Pain	Diclofenac	Amoxicillin	Incorrect Dosage	Colleagues	No	No	Yes	Yes	No
2023-06-02 08:13:49	You are a house surgeon in college	Ardra	I agree to participate in this study with my own wish. I have read and understood the information given by the investigator about the study and it has been explained to me in my own language.	Dental caries	Paracetamol	Amoxicillin	Incorrect Dosage	Professors	Yes	No	Yes	No	Yes
2023-06-02 08:14:37	You are a final year dental student in College	Shalu 23	I agree to participate in this study with my own wish. I have read and understood the information given by the investigator about the study and it has been explained to me in my own language., I understand that my participation is voluntary and free of coercion., I have been given option that I may refuse to participate or withdraw my participation from the study without effecting my health care …	Tooth Sensitivity	Diclofenac	Amoxicillin	Incorrect Dosage	Textbook	Yes	Yes	Yes	Yes	Yes
2023-06-02 08:14:45	You are a final year dental student in College	Arjun	I agree to participate in this study with my own wish. I have read and understood the information given by the investigator about the study and it has been explained to me in my own language., I understand that my participation is voluntary and free of coercion., I have been given option that I may refuse to participate or withdraw my participation from the study without effecting my health care …	Dental caries	Paracetamol	Amoxicillin	Incorrect name of the drug	Textbook	No	No	Yes	No	No
2023-06-02 08:15:28	You are a final year dental student in College	Arun, 23	I agree to participate in this study with my own wish. I have read and understood the information given by the investigator about the study and it has been explained to me in my own language., I understand that my participation is voluntary and free of coercion., I have been given option that I may refuse to participate or withdraw my participation from the study without effecting my health care …	Dental caries	Aceclofenac	Amoxicillin and Clavulanic acid combination	Incorrect Dosage	Textbook	Yes	No	No	No	No
2023-06-02 08:15:42	You are a house surgeon in college	Ahi	I agree to participate in this study with my own wish. I have read and understood the information given by the investigator about the study and it has been explained to me in my own language.	Dental Pain	Paracetamol	Amoxicillin	Incorrect Dosage	Textbook	Yes	Yes	No	Yes	Yes
2023-06-02 08:15:52	You are a final year dental student in College	Geethu	I agree to participate in this study with my own wish. I have read and understood the information given by the investigator about the study and it has been explained to me in my own language., I understand that my participation is voluntary and free of coercion., I have been given option that I may refuse to participate or withdraw my participation from the study without effecting my health care …	Dental caries	Diclofenac	Amoxicillin and Clavulanic acid combination	Incorrect name of the drug	Textbook	No	No	No	Yes	Yes
2023-06-02 08:15:53	You are a house surgeon in college	Aradhika 25	I agree to participate in this study with my own wish. I have read and understood the information given by the investigator about the study and it has been explained to me in my own language., I understand that my participation is voluntary and free of coercion., I have been given option that I may refuse to participate or withdraw my participation from the study without effecting my health care …	Dental caries	Paracetamol	Amoxicillin	Incorrect Dosage	Textbook	Yes	No	No	Yes	No
2023-06-02 08:16:10	You are a house surgeon in college	Richu 22	I agree to participate in this study with my own wish. I have read and understood the information given by the investigator about the study and it has been explained to me in my own language., I understand that my participation is voluntary and free of coercion., I have been given option that I may refuse to participate or withdraw my participation from the study without effecting my health care …	Dental Pain	Paracetamol	Amoxicillin	Incorrect Dosage	Textbook	Yes	Yes	Yes	Yes	Yes
2023-06-02 08:16:32	You are a house surgeon in college	Bismil 23	I agree to participate in this study with my own wish. I have read and understood the information given by the investigator about the study and it has been explained to me in my own language., I understand that my participation is voluntary and free of coercion., I have been given option that I may refuse to participate or withdraw my participation from the study without effecting my health care …	Tooth Sensitivity	Diclofenac	Amoxicillin	Incorrect Dosage	Colleagues	No	No	No	No	Yes
2023-06-02 08:16:36	You are a final year dental student in College	Aswathy	I agree to participate in this study with my own wish. I have read and understood the information given by the investigator about the study and it has been explained to me in my own language.	Dental Pain	Paracetamol	Amoxicillin	Incorrect Dosage	Textbook	Yes	Yes	Yes	No	No
2023-06-02 08:16:45	You are a final year dental student in College	Anu, 23	I agree to participate in this study with my own wish. I have read and understood the information given by the investigator about the study and it has been explained to me in my own language., I understand that my participation is voluntary and free of coercion., I have been given option that I may refuse to participate or withdraw my participation from the study without effecting my health care …	Dental caries	Paracetamol	Amoxicillin	Incorrect Dosage	Professors	Yes	No	No	No	Yes
2023-06-02 08:16:57	You are a final year dental student in College	Ananthu	I agree to participate in this study with my own wish. I have read and understood the information given by the investigator about the study and it has been explained to me in my own language., I understand that my participation is voluntary and free of coercion., I have been given option that I may refuse to participate or withdraw my participation from the study without effecting my health care …	Dental caries	Paracetamol	Amoxicillin	Incorrect Dosage	Textbook	Yes	No	No	Yes	No
2023-06-02 08:17:12	You are a house surgeon in college	Emy krishna 24	I agree to participate in this study with my own wish. I have read and understood the information given by the investigator about the study and it has been explained to me in my own language.	Dental Pain	Diclofenac	Amoxicillin and Clavulanic acid combination	Incorrect Dosage	Professors	Yes	Yes	Yes	Yes	Yes
2023-06-02 08:17:15	You are a final year dental student in College	Albin 22	I agree to participate in this study with my own wish. I have read and understood the information given by the investigator about the study and it has been explained to me in my own language., I understand that my participation is voluntary and free of coercion., I have been given option that I may refuse to participate or withdraw my participation from the study without effecting my health care …	Dental Pain	Paracetamol	Amoxicillin	Incorrect Dosage	Textbook	No	No	Yes	Yes	Yes
2023-06-02 08:17:31	You are a final year dental student in College	Kavya	I agree to participate in this study with my own wish. I have read and understood the information given by the investigator about the study and it has been explained to me in my own language., I understand that my participation is voluntary and free of coercion.	Dental Pain	Paracetamol	Amoxicillin	Incorrect Dosage	Textbook	Yes	No	Yes	No	Yes
2023-06-02 08:17:50	You are a final year dental student in College	Vishnu, 22	I agree to participate in this study with my own wish. I have read and understood the information given by the investigator about the study and it has been explained to me in my own language., I understand that my participation is voluntary and free of coercion., I have been given option that I may refuse to participate or withdraw my participation from the study without effecting my health care …	Dental caries	Aceclofenac	Amoxicillin	Incorrect Dosage	Colleagues	Yes	No	Yes	Yes	No
2023-06-02 08:18:08	You are a house surgeon in college	Adarsh 25	I agree to participate in this study with my own wish. I have read and understood the information given by the investigator about the study and it has been explained to me in my own language.	Dental Pain	Paracetamol	Amoxicillin	Incorrect Dosage	Textbook	Yes	Yes	Yes	Yes	Yes
2023-06-02 08:18:10	You are a house surgeon in college	Moulana mohammed	I understand that my participation is voluntary and free of coercion.	Dental caries	Aceclofenac	Amoxicillin	Incorrect name of the drug	Professors	Yes	Yes	Yes	Yes	Yes
2023-06-02 08:18:15	You are a house surgeon in college	Archa rs	I agree to participate in this study with my own wish. I have read and understood the information given by the investigator about the study and it has been explained to me in my own language., I understand that my participation is voluntary and free of coercion., I have been given option that I may refuse to participate or withdraw my participation from the study without effecting my health care …	Dental Pain	Paracetamol	Amoxicillin	Incorrect Dosage	Textbook	Yes	No	No	Yes	No
2023-06-02 08:18:18	You are a final year dental student in College	Aravind	I agree to participate in this study with my own wish. I have read and understood the information given by the investigator about the study and it has been explained to me in my own language.	Dental Pain	Paracetamol	Amoxicillin	Incorrect Dosage	Textbook	Yes	No	Yes	No	Yes
2023-06-02 08:18:19	You are a final year dental student in College	Akshay Rajan 23	I agree to participate in this study with my own wish. I have read and understood the information given by the investigator about the study and it has been explained to me in my own language., I understand that my participation is voluntary and free of coercion., I have been given option that I may refuse to participate or withdraw my participation from the study without effecting my health care …	Dental Pain	Paracetamol	Amoxicillin	Incorrect Dosage	Colleagues	No	No	Yes	Yes	Yes
2023-06-02 08:18:54	You are a final year dental student in College	Leena 24	I agree to participate in this study with my own wish. I have read and understood the information given by the investigator about the study and it has been explained to me in my own language., I understand that my participation is voluntary and free of coercion., I have been given option that I may refuse to participate or withdraw my participation from the study without effecting my health care …	Dental caries	Paracetamol	Amoxicillin and Clavulanic acid combination	Incorrect Dosage	Professors	No	No	Yes	Yes	No
2023-06-02 08:19:23	You are a house surgeon in college	Srivalli	I understand that my participation is voluntary and free of coercion.	Tooth Sensitivity	Diclofenac	Amoxicillin and Clavulanic acid combination	Incorrect name of the drug	Textbook	No	Yes	Yes	Yes	Yes
2023-06-02 08:19:24	You are a house surgeon in college	Aleena sreedhar	I agree to participate in this study with my own wish. I have read and understood the information given by the investigator about the study and it has been explained to me in my own language., I understand that my participation is voluntary and free of coercion., I have been given option that I may refuse to participate or withdraw my participation from the study without effecting my health care …	Dental caries	Paracetamol	Amoxicillin	Incorrect Dosage	Textbook	Yes	No	No	Yes	No
2023-06-02 08:19:25	You are a house surgeon in college	Ardra 24	I agree to participate in this study with my own wish. I have read and understood the information given by the investigator about the study and it has been explained to me in my own language.	Dental Pain	Paracetamol	Amoxicillin	Incorrect Dosage	Textbook	Yes	Yes	Yes	Yes	Yes
2023-06-02 08:19:38	You are a final year dental student in College	Vishnu Dev	I agree to participate in this study with my own wish. I have read and understood the information given by the investigator about the study and it has been explained to me in my own language., I understand that my participation is voluntary and free of coercion., I have been given option that I may refuse to participate or withdraw my participation from the study without effecting my health care …	Dental caries	Aceclofenac	Amoxicillin and Clavulanic acid combination	Incompatibilities/Drug interactions	Textbook	No	No	Yes	Yes	No
2023-06-02 08:19:50	You are a final year dental student in College	Krishna, 22	I agree to participate in this study with my own wish. I have read and understood the information given by the investigator about the study and it has been explained to me in my own language., I understand that my participation is voluntary and free of coercion., I have been given option that I may refuse to participate or withdraw my participation from the study without effecting my health care …	Dental caries	Paracetamol	Amoxicillin	Incorrect Dosage	Textbook	Yes	Yes	No	No	No
2023-06-02 08:20:15	You are a house surgeon in college	Sini 22	I agree to participate in this study with my own wish. I have read and understood the information given by the investigator about the study and it has been explained to me in my own language., I understand that my participation is voluntary and free of coercion., I have been given option that I may refuse to participate or withdraw my participation from the study without effecting my health care …	Dental Pain	Paracetamol	Amoxicillin	Incompatibilities/Drug interactions	Textbook	No	No	Yes	No	No
2023-06-02 08:20:42	You are a house surgeon in college	Asif ali	I agree to participate in this study with my own wish. I have read and understood the information given by the investigator about the study and it has been explained to me in my own language.	Dental Pain	Paracetamol	Amoxicillin	Incorrect Dosage	Textbook	Yes	Yes	Yes	Yes	Yes
2023-06-02 08:20:45	You are a final year dental student in College	Abdul khan	I agree to participate in this study with my own wish. I have read and understood the information given by the investigator about the study and it has been explained to me in my own language.	Tooth Sensitivity	Aceclofenac	Amoxicillin and Clavulanic acid combination	Incorrect name of the drug	Textbook	No	Yes	No	No	No
2023-06-02 08:20:50	You are a final year dental student in College	Devika premkumar	I agree to participate in this study with my own wish. I have read and understood the information given by the investigator about the study and it has been explained to me in my own language., I understand that my participation is voluntary and free of coercion., I have been given option that I may refuse to participate or withdraw my participation from the study without effecting my health care …	Dental caries	Paracetamol	Amoxicillin	Incorrect Dosage	Textbook	Yes	No	No	Yes	No
2023-06-02 08:20:51	You are a house surgeon in college	Krishna 22	I agree to participate in this study with my own wish. I have read and understood the information given by the investigator about the study and it has been explained to me in my own language., I understand that my participation is voluntary and free of coercion., I have been given option that I may refuse to participate or withdraw my participation from the study without effecting my health care …	Tooth Sensitivity	Aceclofenac	Amoxicillin	Incorrect Dosage	Colleagues	No	No	Yes	No	No
2023-06-02 08:21:16	You are a house surgeon in college	Hiba, 24	I agree to participate in this study with my own wish. I have read and understood the information given by the investigator about the study and it has been explained to me in my own language., I understand that my participation is voluntary and free of coercion., I have been given option that I may refuse to participate or withdraw my participation from the study without effecting my health care …	Dental Pain	Paracetamol	Amoxicillin	Incorrect Dosage	Colleagues	Yes	No	Yes	No	No
2023-06-02 08:21:18	You are a final year dental student in College	Sunil 23	I agree to participate in this study with my own wish. I have read and understood the information given by the investigator about the study and it has been explained to me in my own language., I understand that my participation is voluntary and free of coercion., I have been given option that I may refuse to participate or withdraw my participation from the study without effecting my health care …	Dental Pain	Paracetamol	Amoxicillin	Incorrect Dosage	Textbook	Yes	No	Yes	Yes	Yes
2023-06-02 08:21:25	You are a house surgeon in college	Lalitha ee	I understand that my participation is voluntary and free of coercion.	Dental Pain	Paracetamol	Amoxicillin	Incorrect Dosage	Textbook	Yes	Yes	Yes	Yes	Yes
2023-06-02 08:21:57	You are a house surgeon in college	John 22	I agree to participate in this study with my own wish. I have read and understood the information given by the investigator about the study and it has been explained to me in my own language., I understand that my participation is voluntary and free of coercion., I have been given option that I may refuse to participate or withdraw my participation from the study without effecting my health care …	Dental caries	Paracetamol	Amoxicillin	Incorrect name of the drug	Textbook	No	No	No	No	No
2023-06-02 08:22:03	You are a final year dental student in College	Pinky	I agree to participate in this study with my own wish. I have read and understood the information given by the investigator about the study and it has been explained to me in my own language.	Dental Pain	Aceclofenac	Metrogyl	Incorrect Dosage	Textbook	Yes	Yes	Yes	Yes	Yes
2023-06-02 08:22:08	You are a house surgeon in college	Prithviraj	I agree to participate in this study with my own wish. I have read and understood the information given by the investigator about the study and it has been explained to me in my own language., I understand that my participation is voluntary and free of coercion.	Dental Pain	Paracetamol	Amoxicillin	Incorrect Dosage	Textbook	Yes	Yes	Yes	Yes	Yes
2023-06-02 08:22:09	You are a house surgeon in college	Ammu 23	I agree to participate in this study with my own wish. I have read and understood the information given by the investigator about the study and it has been explained to me in my own language., I understand that my participation is voluntary and free of coercion., I have been given option that I may refuse to participate or withdraw my participation from the study without effecting my health care …	Dental Pain	Paracetamol	Amoxicillin	Incorrect Dosage	Textbook	Yes	Yes	Yes	Yes	Yes
2023-06-02 08:22:38	You are a house surgeon in college	Radhika	I understand that my participation is voluntary and free of coercion., I have been given option that I may refuse to participate or withdraw my participation from the study without effecting my health care or rights., I have been given adequate time to understand the implications of consenting., I have opportunity to ask questions from the principal investigators., I have the option to retain one…	Dental caries	Paracetamol	Amoxicillin	Incorrect Dosage	Textbook	Yes	No	No	Yes	No
2023-06-02 08:22:49	You are a final year dental student in College	Anu S 23	I agree to participate in this study with my own wish. I have read and understood the information given by the investigator about the study and it has been explained to me in my own language., I understand that my participation is voluntary and free of coercion., I have been given option that I may refuse to participate or withdraw my participation from the study without effecting my health care …	Dental Pain	Paracetamol	Amoxicillin and Clavulanic acid combination	Incorrect Dosage	Textbook	No	No	Yes	Yes	Yes
2023-06-02 08:22:50	You are a final year dental student in College	Anjitha, 24	I agree to participate in this study with my own wish. I have read and understood the information given by the investigator about the study and it has been explained to me in my own language., I understand that my participation is voluntary and free of coercion., I have been given option that I may refuse to participate or withdraw my participation from the study without effecting my health care …	Dental caries	Paracetamol	Amoxicillin	Incorrect Dosage	Colleagues	Yes	No	Yes	No	No
2023-06-02 08:22:51	You are a final year dental student in College	Muthu kumar	I agree to participate in this study with my own wish. I have read and understood the information given by the investigator about the study and it has been explained to me in my own language.	Dental Pain	Diclofenac	Metrogyl	Incompatibilities/Drug interactions	Professors	Yes	Yes	Yes	Yes	Yes
2023-06-02 08:22:56	You are a house surgeon in college	Trisha 26	I agree to participate in this study with my own wish. I have read and understood the information given by the investigator about the study and it has been explained to me in my own language.	Dental Pain	Paracetamol	Amoxicillin	Incorrect Dosage	Textbook	Yes	Yes	Yes	Yes	Yes
2023-06-02 08:23:01	You are a house surgeon in college	Nayanthara 23	I agree to participate in this study with my own wish. I have read and understood the information given by the investigator about the study and it has been explained to me in my own language., I understand that my participation is voluntary and free of coercion., I have been given option that I may refuse to participate or withdraw my participation from the study without effecting my health care …	Dental Pain	Paracetamol	Amoxicillin	Incorrect Dosage	Textbook	Yes	Yes	Yes	Yes	Yes
2023-06-02 08:23:18	You are a final year dental student in College	Hari	I agree to participate in this study with my own wish. I have read and understood the information given by the investigator about the study and it has been explained to me in my own language.	Dental Pain	Paracetamol	Amoxicillin	Incorrect Dosage	Textbook	Yes	Yes	No	Yes	No
2023-06-02 08:23:31	You are a final year dental student in College	Hari	I agree to participate in this study with my own wish. I have read and understood the information given by the investigator about the study and it has been explained to me in my own language., I understand that my participation is voluntary and free of coercion., I have been given option that I may refuse to participate or withdraw my participation from the study without effecting my health care …	Dental caries	Paracetamol	Amoxicillin	Incorrect Dosage	Textbook	Yes	No	No	Yes	No
2023-06-02 08:23:43	You are a final year dental student in College	Aparna 23	I agree to participate in this study with my own wish. I have read and understood the information given by the investigator about the study and it has been explained to me in my own language., I understand that my participation is voluntary and free of coercion., I have been given option that I may refuse to participate or withdraw my participation from the study without effecting my health care …	Dental Pain	Aceclofenac	Amoxicillin	Incorrect Dosage	Professors	No	No	No	No	Yes
2023-06-02 08:23:52	You are a final year dental student in College	Sreelekshmi, 24	I agree to participate in this study with my own wish. I have read and understood the information given by the investigator about the study and it has been explained to me in my own language., I understand that my participation is voluntary and free of coercion., I have been given option that I may refuse to participate or withdraw my participation from the study without effecting my health care …	Dental caries	Aceclofenac	Amoxicillin and Clavulanic acid combination	Incorrect Dosage	Colleagues	No	Yes	No	Yes	No
2023-06-02 08:24:22	You are a house surgeon in college	Rajubhai	I agree to participate in this study with my own wish. I have read and understood the information given by the investigator about the study and it has been explained to me in my own language.	Dental Pain	Paracetamol	Amoxicillin	Incorrect Dosage	Textbook	Yes	Yes	Yes	Yes	Yes
2023-06-02 08:24:23	You are a final year dental student in College	Abi	I agree to participate in this study with my own wish. I have read and understood the information given by the investigator about the study and it has been explained to me in my own language.	Dental Pain	Paracetamol	Amoxicillin	Incorrect Dosage	Textbook	Yes	Yes	No	Yes	Yes
2023-06-02 08:24:28	You are a house surgeon in college	Ashwin	I agree to participate in this study with my own wish. I have read and understood the information given by the investigator about the study and it has been explained to me in my own language., I understand that my participation is voluntary and free of coercion., I have been given option that I may refuse to participate or withdraw my participation from the study without effecting my health care …	Dental caries	Paracetamol	Amoxicillin	Incorrect Dosage	Textbook	Yes	No	No	Yes	No
2023-06-02 08:24:43	You are a final year dental student in College	Arshana 22	I agree to participate in this study with my own wish. I have read and understood the information given by the investigator about the study and it has been explained to me in my own language., I understand that my participation is voluntary and free of coercion., I have been given option that I may refuse to participate or withdraw my participation from the study without effecting my health care …	Dental Pain	Diclofenac	Amoxicillin	Incorrect Dosage	Colleagues	No	No	Yes	Yes	Yes
2023-06-02 08:24:46	You are a house surgeon in college	Riya, 21	I agree to participate in this study with my own wish. I have read and understood the information given by the investigator about the study and it has been explained to me in my own language., I understand that my participation is voluntary and free of coercion., I have been given option that I may refuse to participate or withdraw my participation from the study without effecting my health care …	Dental caries	Paracetamol	Amoxicillin	Incorrect Dosage	Textbook	No	Yes	No	Yes	No
2023-06-02 08:25:07	You are a final year dental student in College	Jithu	I agree to participate in this study with my own wish. I have read and understood the information given by the investigator about the study and it has been explained to me in my own language.	Dental Pain	Paracetamol	Amoxicillin	Incorrect Dosage	Textbook	Yes	Yes	No	Yes	Yes
2023-06-02 08:25:09	You are a house surgeon in college	keerthana	I agree to participate in this study with my own wish. I have read and understood the information given by the investigator about the study and it has been explained to me in my own language.	Dental Pain	Paracetamol	Amoxicillin	Incorrect Dosage	Textbook	Yes	Yes	Yes	Yes	Yes
2023-06-02 08:25:09	You are a final year dental student in College	Aromal	I agree to participate in this study with my own wish. I have read and understood the information given by the investigator about the study and it has been explained to me in my own language., I understand that my participation is voluntary and free of coercion., I have been given option that I may refuse to participate or withdraw my participation from the study without effecting my health care …	Dental caries	Paracetamol	Amoxicillin	Incorrect Dosage	Textbook	Yes	No	No	Yes	No
2023-06-02 08:26:01	You are a final year dental student in College	Sneha 23	I agree to participate in this study with my own wish. I have read and understood the information given by the investigator about the study and it has been explained to me in my own language., I understand that my participation is voluntary and free of coercion., I have been given option that I may refuse to participate or withdraw my participation from the study without effecting my health care …	Others	Others	Metrogyl	Incorrect Dosage	Others	No	No	No	Yes	Yes
2023-06-02 08:26:02	You are a house surgeon in college	Kripa	I agree to participate in this study with my own wish. I have read and understood the information given by the investigator about the study and it has been explained to me in my own language.	Dental Pain	Paracetamol	Amoxicillin	Incorrect Dosage	Textbook	Yes	Yes	Yes	Yes	Yes
2023-06-02 08:26:03	You are a final year dental student in College	Nithin	I agree to participate in this study with my own wish. I have read and understood the information given by the investigator about the study and it has been explained to me in my own language.	Dental Pain	Paracetamol	Amoxicillin	Incorrect Dosage	Textbook	Yes	Yes	Yes	Yes	No
2023-06-02 08:26:06	You are a house surgeon in college	Aiswarya 23	I agree to participate in this study with my own wish. I have read and understood the information given by the investigator about the study and it has been explained to me in my own language., I understand that my participation is voluntary and free of coercion., I have been given option that I may refuse to participate or withdraw my participation from the study without effecting my health care …	Dental Pain	Paracetamol	Amoxicillin	Incorrect Dosage	Others	Yes	Yes	No	No	Yes
2023-06-02 08:26:20	You are a house surgeon in college	Monaayi	I agree to participate in this study with my own wish. I have read and understood the information given by the investigator about the study and it has been explained to me in my own language.	Dental Pain	Paracetamol	Amoxicillin	Incorrect Dosage	Textbook	Yes	Yes	Yes	Yes	Yes
2023-06-02 08:26:34	You are a final year dental student in College	Sunitha	I agree to participate in this study with my own wish. I have read and understood the information given by the investigator about the study and it has been explained to me in my own language., I understand that my participation is voluntary and free of coercion., I have been given option that I may refuse to participate or withdraw my participation from the study without effecting my health care …	Dental caries	Paracetamol	Others	Others	Others	Yes	No	Yes	No	No
2023-06-02 08:26:35	You are a house surgeon in college	Aravind	I agree to participate in this study with my own wish. I have read and understood the information given by the investigator about the study and it has been explained to me in my own language., I understand that my participation is voluntary and free of coercion., I have been given option that I may refuse to participate or withdraw my participation from the study without effecting my health care …	Dental caries	Paracetamol	Amoxicillin	Incorrect Dosage	Textbook	Yes	No	No	Yes	No
2023-06-02 08:27:00	You are a final year dental student in College	Ejas 23	I agree to participate in this study with my own wish. I have read and understood the information given by the investigator about the study and it has been explained to me in my own language., I understand that my participation is voluntary and free of coercion., I have been given option that I may refuse to participate or withdraw my participation from the study without effecting my health care …	Dental Pain	Paracetamol	Amoxicillin	Incompatibilities/Drug interactions	Textbook	Yes	Yes	Yes	Yes	Yes
2023-06-02 08:27:06	You are a final year dental student in College	Nibin	I agree to participate in this study with my own wish. I have read and understood the information given by the investigator about the study and it has been explained to me in my own language.	Dental Pain	Paracetamol	Amoxicillin and Clavulanic acid combination	Incorrect Dosage	Textbook	Yes	No	Yes	No	Yes
2023-06-02 08:27:09	You are a house surgeon in college	Rajubhai	I agree to participate in this study with my own wish. I have read and understood the information given by the investigator about the study and it has been explained to me in my own language.	Dental Pain	Paracetamol	Amoxicillin	Incorrect Dosage	Textbook	Yes	Yes	Yes	Yes	Yes
2023-06-02 08:27:37	You are a final year dental student in College	Parvathy, 22	I agree to participate in this study with my own wish. I have read and understood the information given by the investigator about the study and it has been explained to me in my own language., I understand that my participation is voluntary and free of coercion., I have been given option that I may refuse to participate or withdraw my participation from the study without effecting my health care …	Dental caries	Paracetamol	Amoxicillin and Clavulanic acid combination	Incorrect Dosage	Professors	No	Yes	No	Yes	No
2023-06-02 08:27:40	You are a final year dental student in College	Maria	I agree to participate in this study with my own wish. I have read and understood the information given by the investigator about the study and it has been explained to me in my own language., I understand that my participation is voluntary and free of coercion., I have been given option that I may refuse to participate or withdraw my participation from the study without effecting my health care …	Dental caries	Paracetamol	Amoxicillin	Incorrect Dosage	Textbook	Yes	No	No	Yes	No
2023-06-02 08:27:45	You are a final year dental student in College	Manu 22	I agree to participate in this study with my own wish. I have read and understood the information given by the investigator about the study and it has been explained to me in my own language., I understand that my participation is voluntary and free of coercion., I have been given option that I may refuse to participate or withdraw my participation from the study without effecting my health care …	Dental Pain	Paracetamol	Amoxicillin	Incompatibilities/Drug interactions	Others	No	No	Yes	Yes	Yes
2023-06-02 08:27:46	You are a house surgeon in college	Chandru 23	I agree to participate in this study with my own wish. I have read and understood the information given by the investigator about the study and it has been explained to me in my own language., I understand that my participation is voluntary and free of coercion., I have been given option that I may refuse to participate or withdraw my participation from the study without effecting my health care …	Dental Pain	Paracetamol	Amoxicillin	Incorrect Dosage	Textbook	Yes	Yes	Yes	Yes	Yes
2023-06-02 08:27:47	You are a house surgeon in college	Akhil	I agree to participate in this study with my own wish. I have read and understood the information given by the investigator about the study and it has been explained to me in my own language.	Dental Pain	Paracetamol	Amoxicillin	Incorrect Dosage	Textbook	Yes	No	Yes	Yes	No
2023-06-02 08:27:54	You are a final year dental student in College	Samantha	I agree to participate in this study with my own wish. I have read and understood the information given by the investigator about the study and it has been explained to me in my own language.	Dental Pain	Paracetamol	Metrogyl	Incorrect Dosage	Textbook	Yes	Yes	Yes	Yes	Yes
2023-06-02 08:28:27	You are a final year dental student in College	Babitha	I agree to participate in this study with my own wish. I have read and understood the information given by the investigator about the study and it has been explained to me in my own language., I understand that my participation is voluntary and free of coercion., I have been given option that I may refuse to participate or withdraw my participation from the study without effecting my health care …	Dental caries	Paracetamol	Amoxicillin	Incorrect Dosage	Textbook	Yes	No	No	No	No
2023-06-02 08:28:35	You are a final year dental student in College	Arya	I agree to participate in this study with my own wish. I have read and understood the information given by the investigator about the study and it has been explained to me in my own language.	Dental Pain	Paracetamol	Amoxicillin	Incorrect Dosage	Textbook	Yes	No	Yes	No	Yes
2023-06-02 08:28:36	You are a house surgeon in college	Anil 24	I agree to participate in this study with my own wish. I have read and understood the information given by the investigator about the study and it has been explained to me in my own language., I understand that my participation is voluntary and free of coercion., I have been given option that I may refuse to participate or withdraw my participation from the study without effecting my health care …	Dental Pain	Paracetamol	Amoxicillin	Others	Others	No	No	Yes	Yes	Yes
2023-06-02 08:28:40	You are a final year dental student in College	Akhil marar	I agree to participate in this study with my own wish. I have read and understood the information given by the investigator about the study and it has been explained to me in my own language.	Dental Pain	Paracetamol	Amoxicillin	Incorrect Dosage	Textbook	Yes	Yes	Yes	Yes	Yes
2023-06-02 08:28:43	You are a house surgeon in college	Darshana, 21	I agree to participate in this study with my own wish. I have read and understood the information given by the investigator about the study and it has been explained to me in my own language., I understand that my participation is voluntary and free of coercion., I have been given option that I may refuse to participate or withdraw my participation from the study without effecting my health care …	Dental Pain	Diclofenac	Metrogyl	Incompatibilities/Drug interactions	Professors	Yes	No	No	No	No
2023-06-02 08:28:52	You are a house surgeon in college	Shan 23	I agree to participate in this study with my own wish. I have read and understood the information given by the investigator about the study and it has been explained to me in my own language., I understand that my participation is voluntary and free of coercion., I have been given option that I may refuse to participate or withdraw my participation from the study without effecting my health care …	Dental Pain	Paracetamol	Amoxicillin	Incorrect Dosage	Textbook	Yes	Yes	Yes	Yes	Yes
2023-06-02 08:29:06	You are a house surgeon in college	Sagar surya	I have the option to retain one copy of the consent form or one copy of the participant information sheet.	Dental Pain	Diclofenac	Others	Incorrect name of the drug	Others	Yes	Yes	No	Yes	Yes
2023-06-02 08:29:15	You are a final year dental student in College	Vishnu joshi	I agree to participate in this study with my own wish. I have read and understood the information given by the investigator about the study and it has been explained to me in my own language.	Dental Pain	Paracetamol	Amoxicillin	Incorrect Dosage	Textbook	Yes	Yes	Yes	Yes	Yes
2023-06-02 08:29:26	You are a house surgeon in college	Akhil ansari	I agree to participate in this study with my own wish. I have read and understood the information given by the investigator about the study and it has been explained to me in my own language., I understand that my participation is voluntary and free of coercion., I have been given option that I may refuse to participate or withdraw my participation from the study without effecting my health care …	Dental caries	Paracetamol	Amoxicillin	Incorrect Dosage	Textbook	Yes	No	Yes	Yes	No
2023-06-02 08:29:29	You are a house surgeon in college	Anagha, 23	I agree to participate in this study with my own wish. I have read and understood the information given by the investigator about the study and it has been explained to me in my own language., I understand that my participation is voluntary and free of coercion., I have been given option that I may refuse to participate or withdraw my participation from the study without effecting my health care …	Dental caries	Aceclofenac	Amoxicillin and Clavulanic acid combination	Incorrect Dosage	Colleagues	No	No	No	No	Yes
2023-06-02 08:29:29	You are a final year dental student in College	Anjusree 23	I agree to participate in this study with my own wish. I have read and understood the information given by the investigator about the study and it has been explained to me in my own language., I understand that my participation is voluntary and free of coercion., I have been given option that I may refuse to participate or withdraw my participation from the study without effecting my health care …	Dental Pain	Paracetamol	Amoxicillin	Incorrect Dosage	Others	No	No	Yes	Yes	No
